# Supplementary material for: Temperature dependent chiroptical response of sigmoidal gold clusters: probing the stability of chiral metal clusters
Source: Royal Society of Chemistry journal article supplement (doi:10.1039/c8sc00344k), 2018-01-01
Supplement: c8sc00344k1.pdf [file c8sc00344k1.pdf]

## Supporting Information

### **Temperature dependent chiroptical response of sigmoidal gold clusters: probing the stability of chiral metal clusters**

Ping Guo,<sup>a</sup> Biao Yang,<sup>a</sup> Li Zhang,<sup>b</sup> and Liang Zhao\*,<sup>a</sup>

<sup>a</sup> The Key Laboratory of Bioorganic Phosphorus Chemistry & Chemical Biology (Ministry of Education), Department of Chemistry, Tsinghua University, Beijing 100084, China

<sup>b</sup> Beijing National Laboratory for Molecular Science, CAS Key Laboratory of Colloid, Interface and Chemical Thermodynamics, Institute of Chemistry, Chinese Academy of Sciences, Beijing 100190, China.

E-mail: zhaolchem@mail.tsinghua.edu.cn

## Supplementary Figures

GP-163-2 #9-11 RT: 0.13-0.16 AV: 3 NL: 1.66E8  
T: FTMS {1,1} + p ESI Full ms [800.00-3500.00]

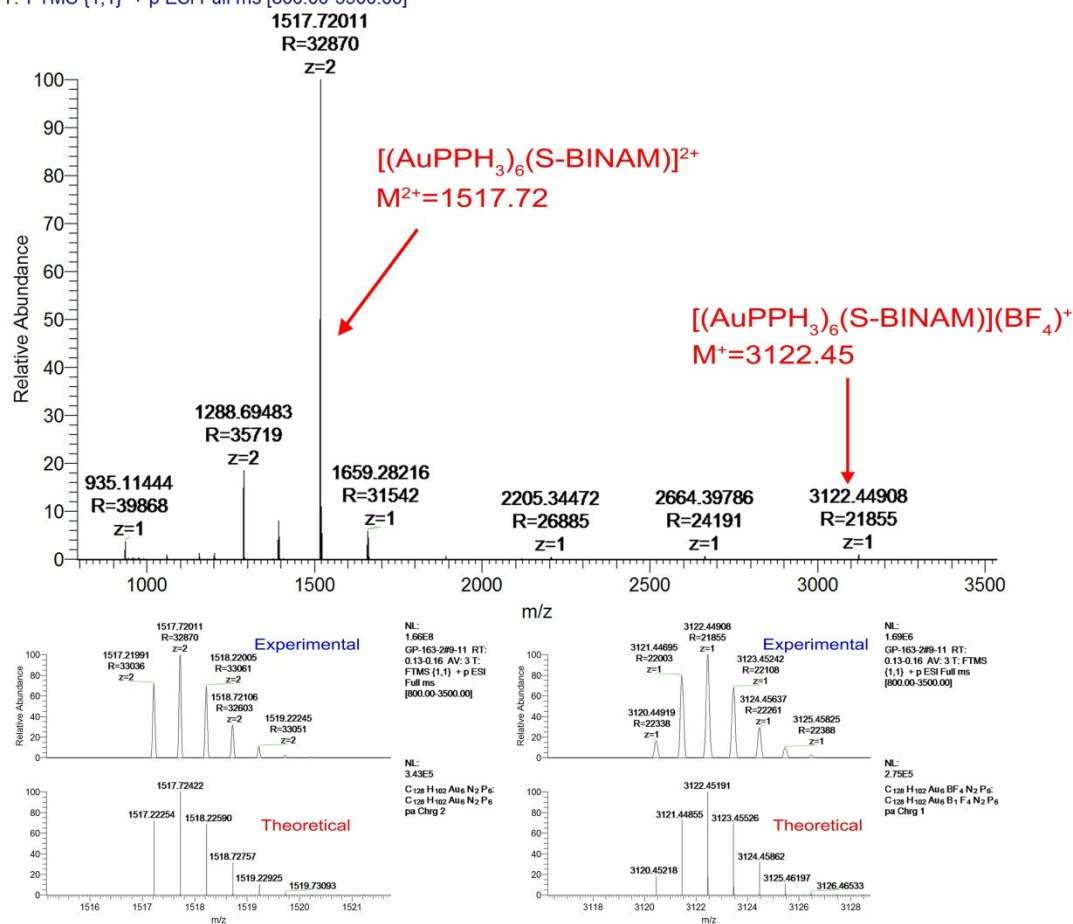

**Fig. S1** Top: ESI-MS spectra of the acetonitrile solution containing **1-(S<sub>a</sub>)**. Bottom: experimental (above) and theoretical (bottom) isotopic distribution of the ion fragment (left) **[(AuPPh<sub>3</sub>)<sub>6</sub>(S-BINAM)]<sup>2+</sup>**, (right) **[(AuPPh<sub>3</sub>)<sub>6</sub>(S-BINAM)](BF<sub>4</sub>)<sup>+</sup>** in ESI-MS spectra.

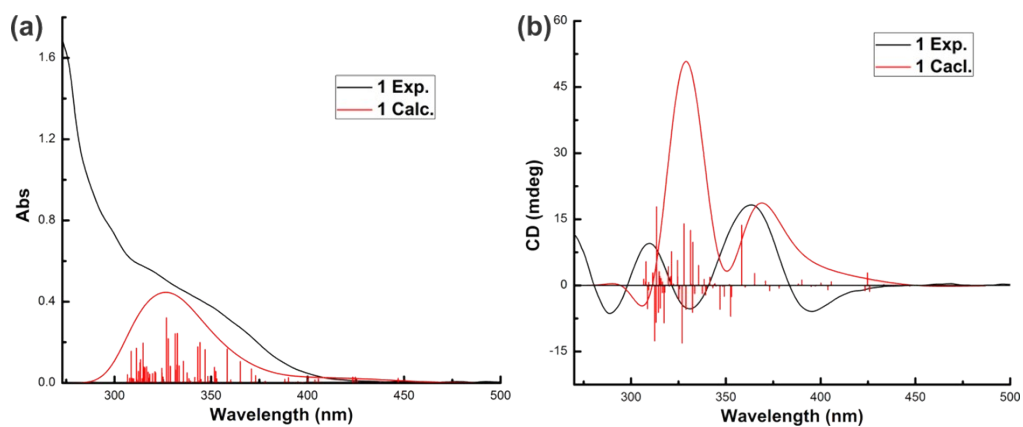

**Fig. S2** Experimental (black line) and calculated (red line) (a) UV-vis absorption and (b) CD spectra of **1-(S<sub>a</sub>)**.

**Table S1.** Mulliken population of **1-(S<sub>a</sub>)**.

|                        | LUMO+3 | LUMO+2 | LUMO+1 | LUMO   | HOMO   | HOMO-1 | HOMO-2 | HOMO-3 |
|------------------------|--------|--------|--------|--------|--------|--------|--------|--------|
| <b>Au</b>              | 0.090  | 0.001  | 1.099  | 1.308  | -0.410 | 0.077  | 0.586  | 0.039  |
| <b>N</b>               | 0.000  | 0.000  | -0.054 | -0.044 | -0.004 | 0.002  | -0.008 | 0.000  |
| <b>L</b>               | 0.001  | 0.000  | 99.127 | 98.816 | 99.082 | 99.288 | 99.350 | 99.610 |
| <b>PPh<sub>3</sub></b> | 99.909 | 99.999 | -0.172 | -0.008 | 1.332  | 0.633  | 0.072  | 0.351  |

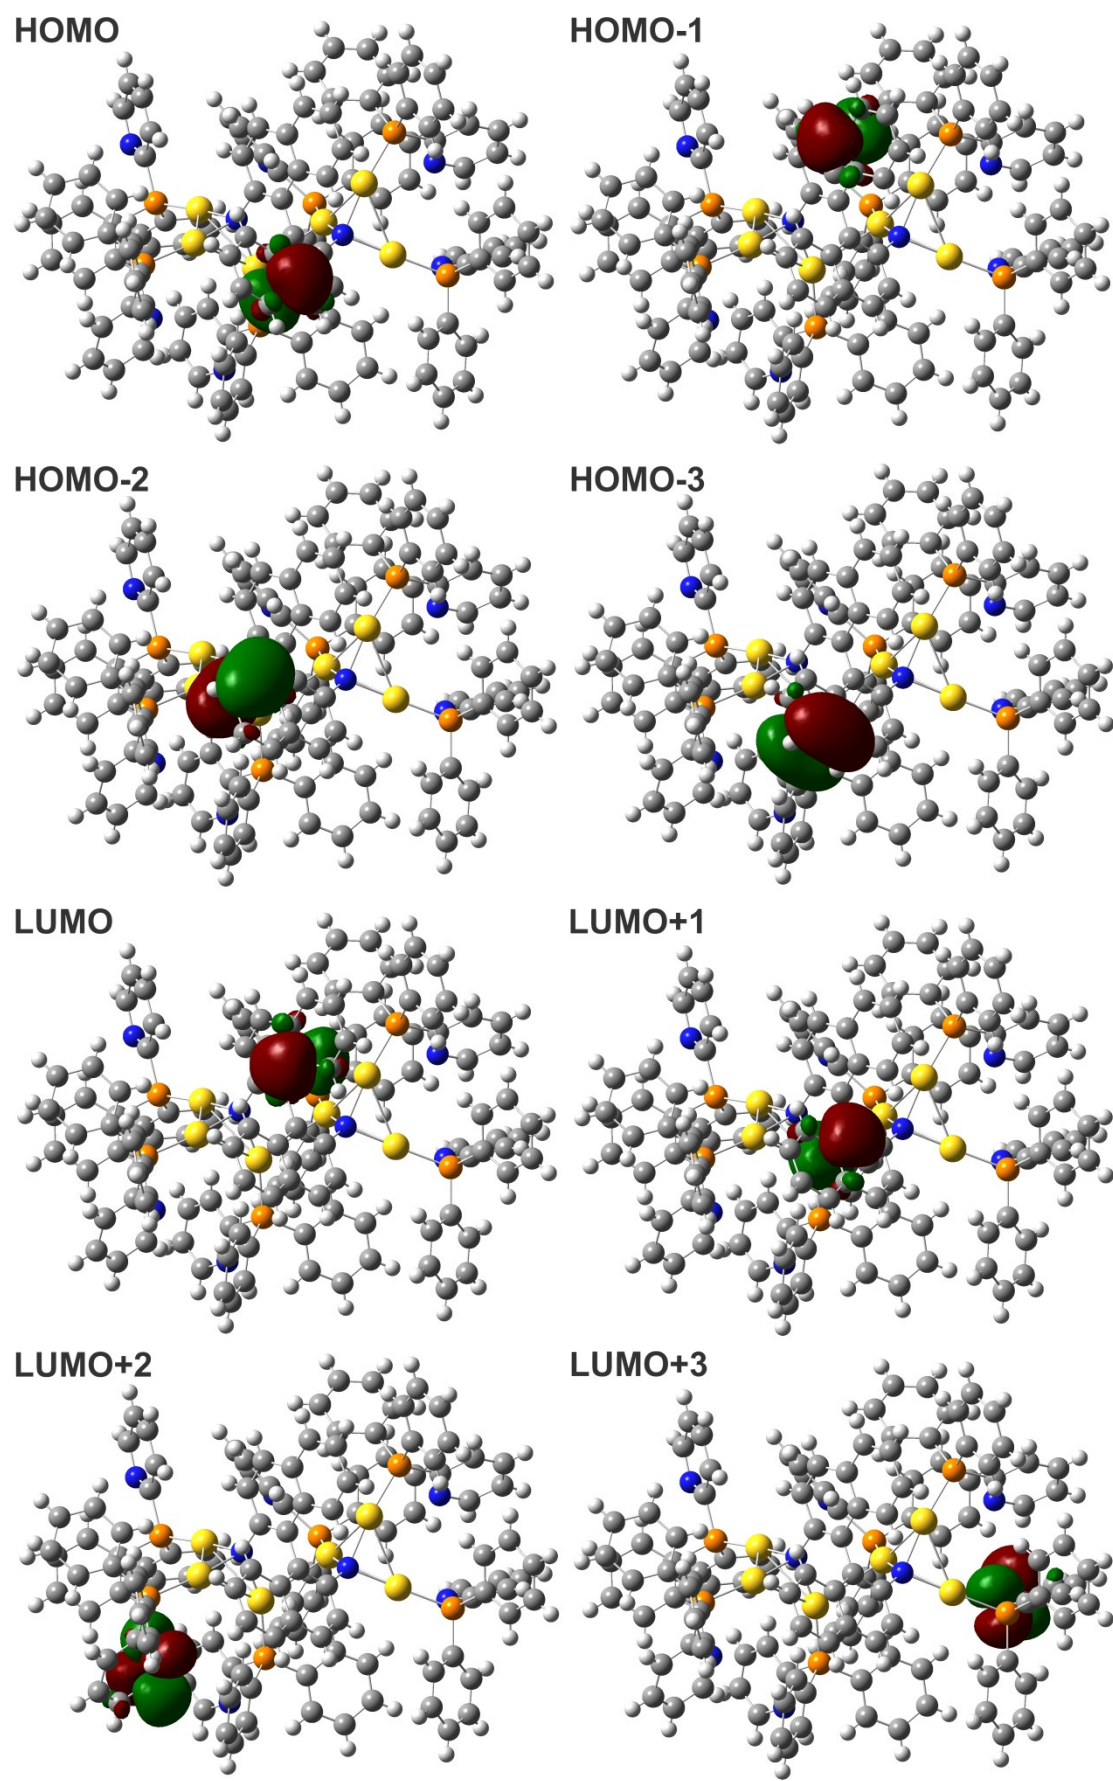

**Fig. S3** Plots of near-frontier transition-related orbitals of **1-(S<sub>a</sub>)**.

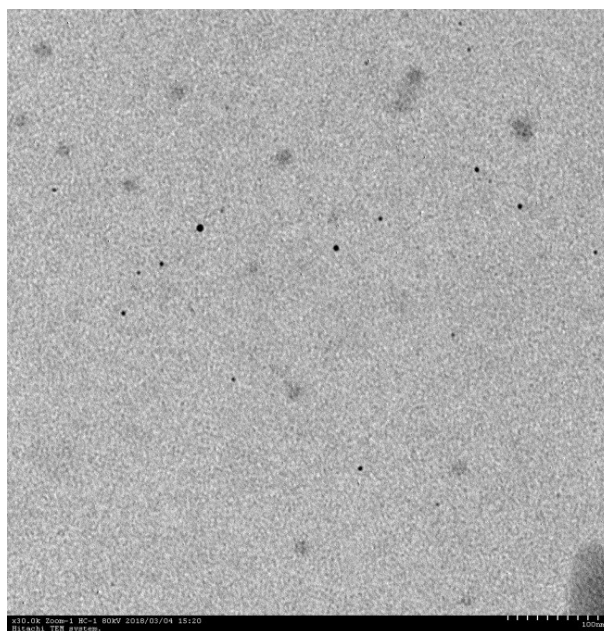

**Fig. S4** TEM image of the **1-(S<sub>a</sub>)** sample which was heated to 70 °C and then cooled back to 20 °C, indicating the formation of gold nanoparticles.

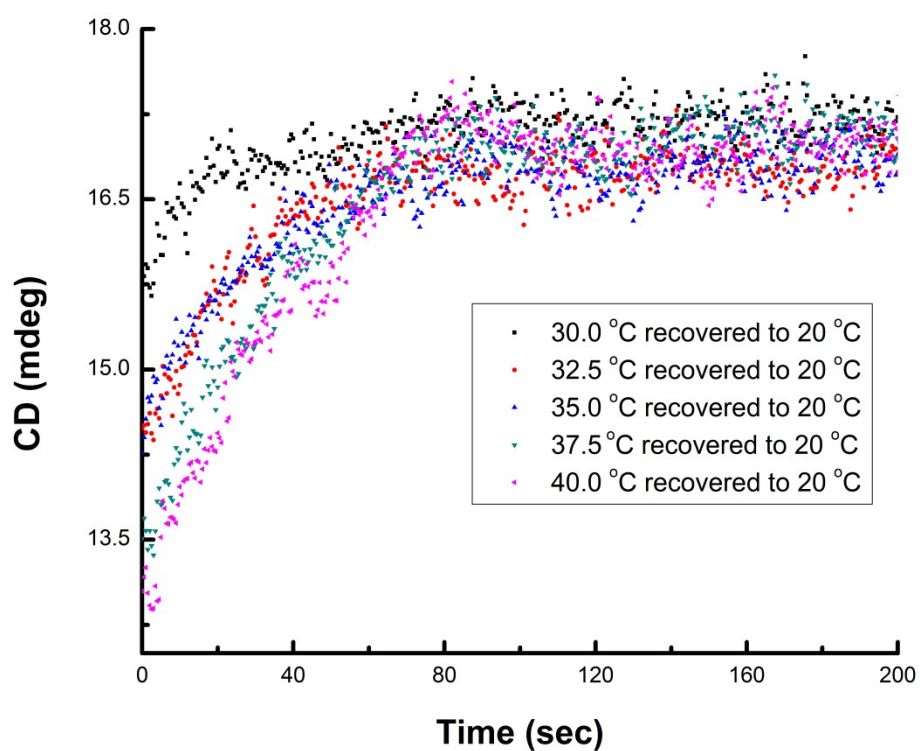

**Fig. S5** CD response of **1-(S<sub>a</sub>)** at 361 nm from different elevated temperatures recovered to 20 °C.

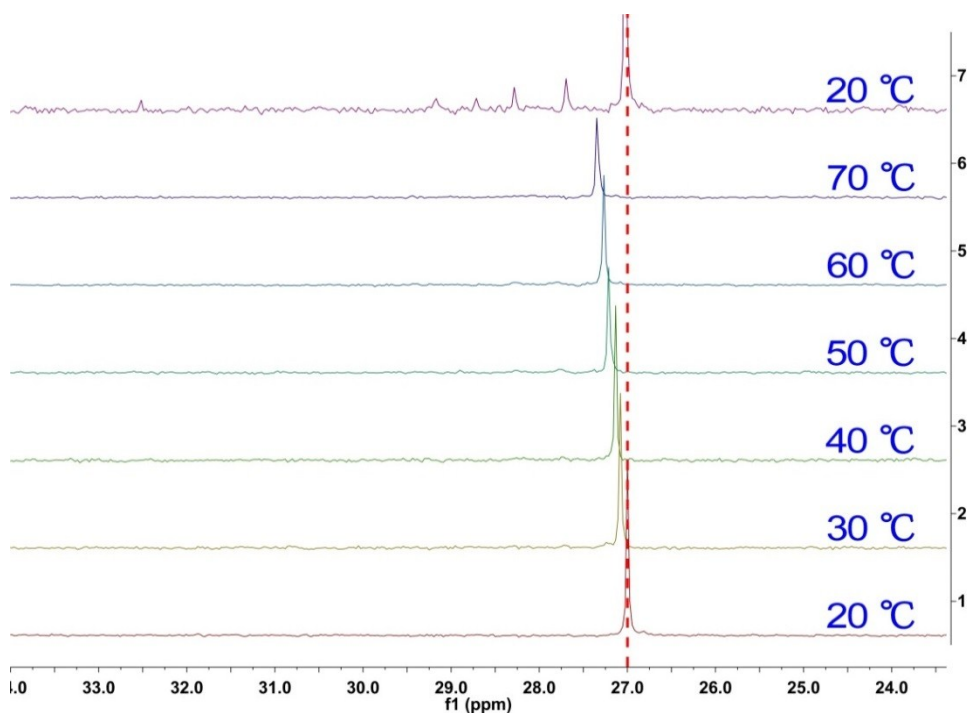

**Fig. S6** Variable temperature  $^{31}\text{P}$  NMR spectra (DMSO- $\text{d}_6$ ) of **1-(S<sub>a</sub>)** from 20 to 70 °C and back to 20 °C.

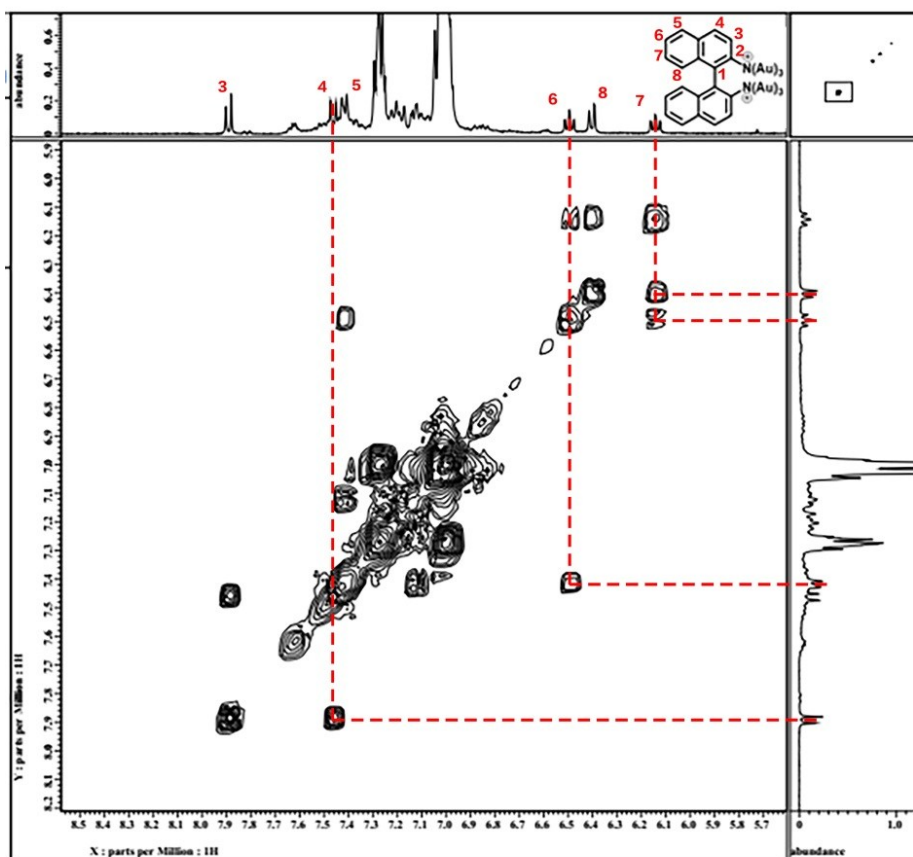

**Fig. S7** 2D  $^1\text{H}$ - $^1\text{H}$  COSY spectrum of **1-(S<sub>a</sub>)** in DMSO- $\text{d}_6$  at 298K.

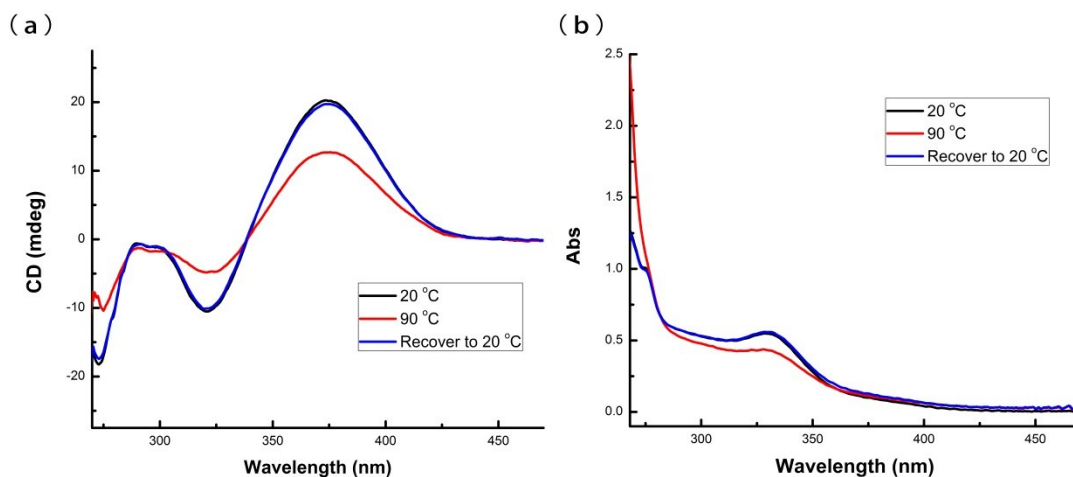

**Fig. S8** (a) CD and (b) UV-vis spectra of the DMSO solution ( $c = 2.5 \times 10^{-5}$  M) of **2-(R,R)** in 20 °C, heated to 90 °C, and cooled back to 20 °C.

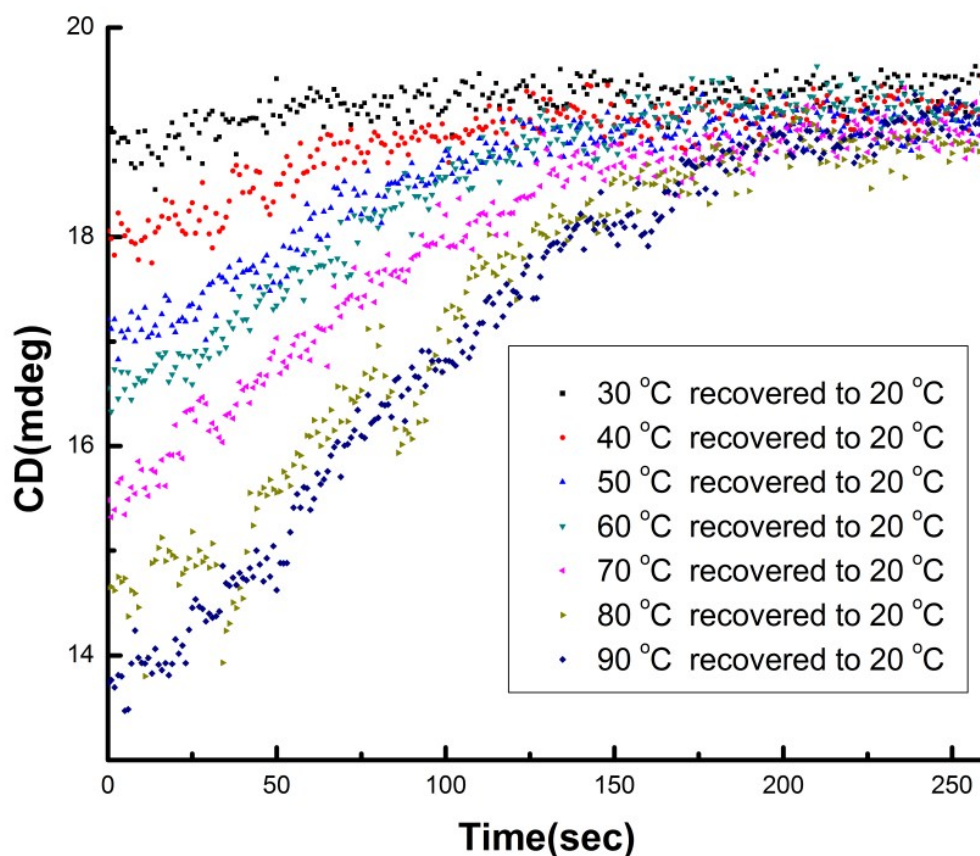

**Fig. S9** CD response of **2-(R,R)** at 372 nm from different elevated temperatures recovered to 20 °C.

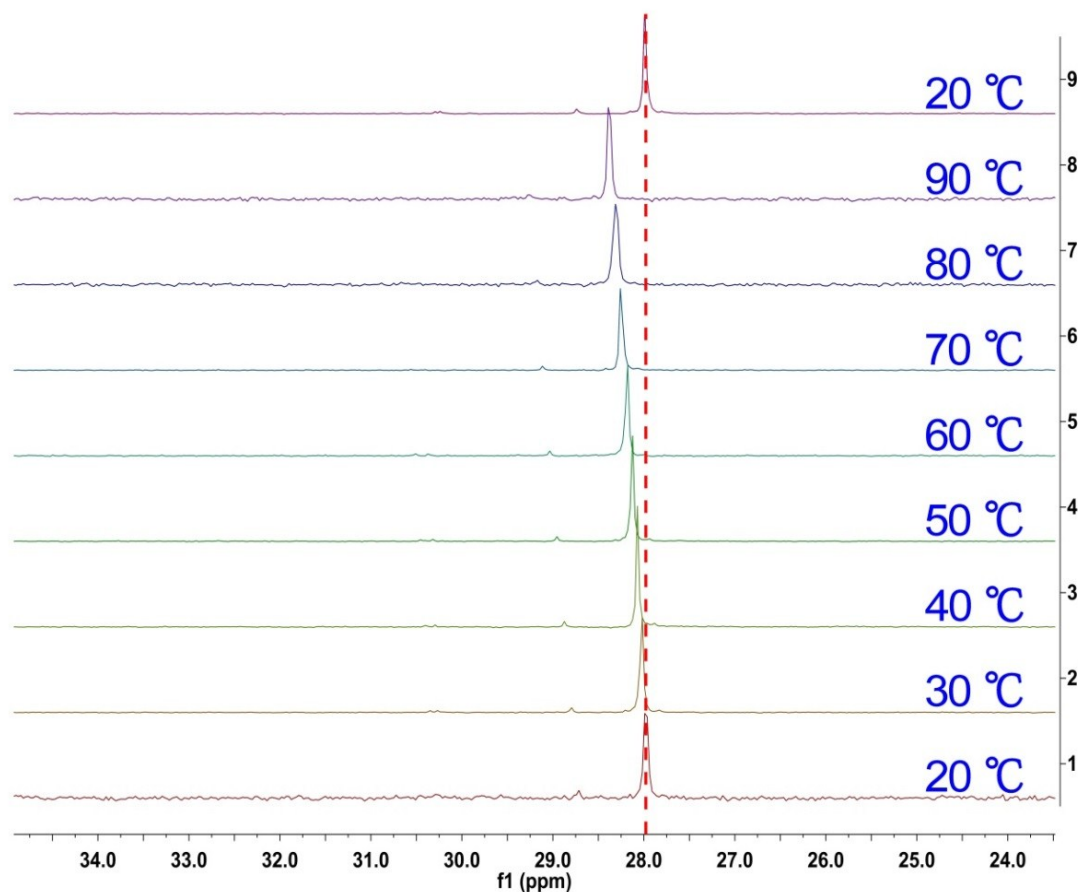

**Fig. S10** Variable temperature  $^{31}\text{P}$  NMR spectra (DMSO- $d_6$ ) of **2-(*R,R*)** from 20 to 90 °C and back to 20 °C.

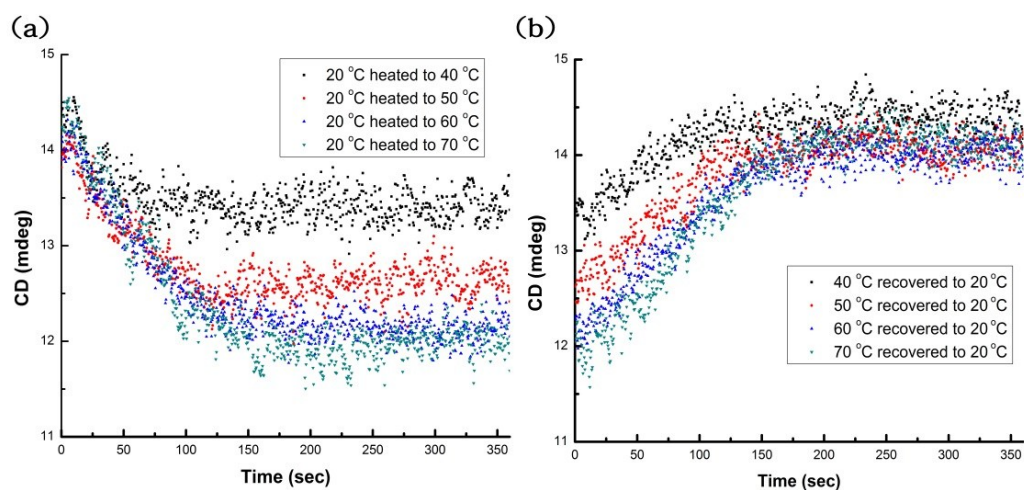

**Fig. S11** (a) CD response of **3-(*R,R*)** at 373 nm reaches a steady state at different temperatures. (b) CD response of **3-(*R,R*)** at 373 nm from different elevated temperatures recovered to 20 °C.



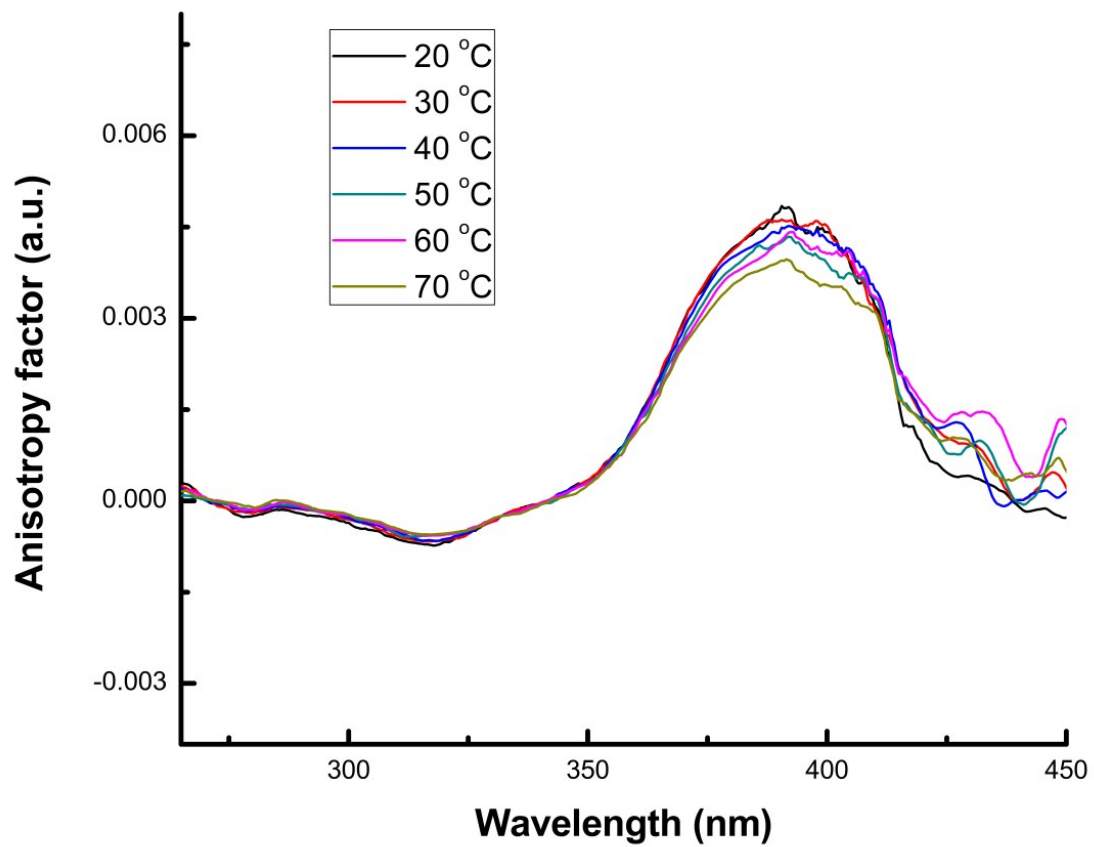

**Fig. S12** Unsynchronized variation of the anisotropy factors for different CD signals of **3-(R, R)**.

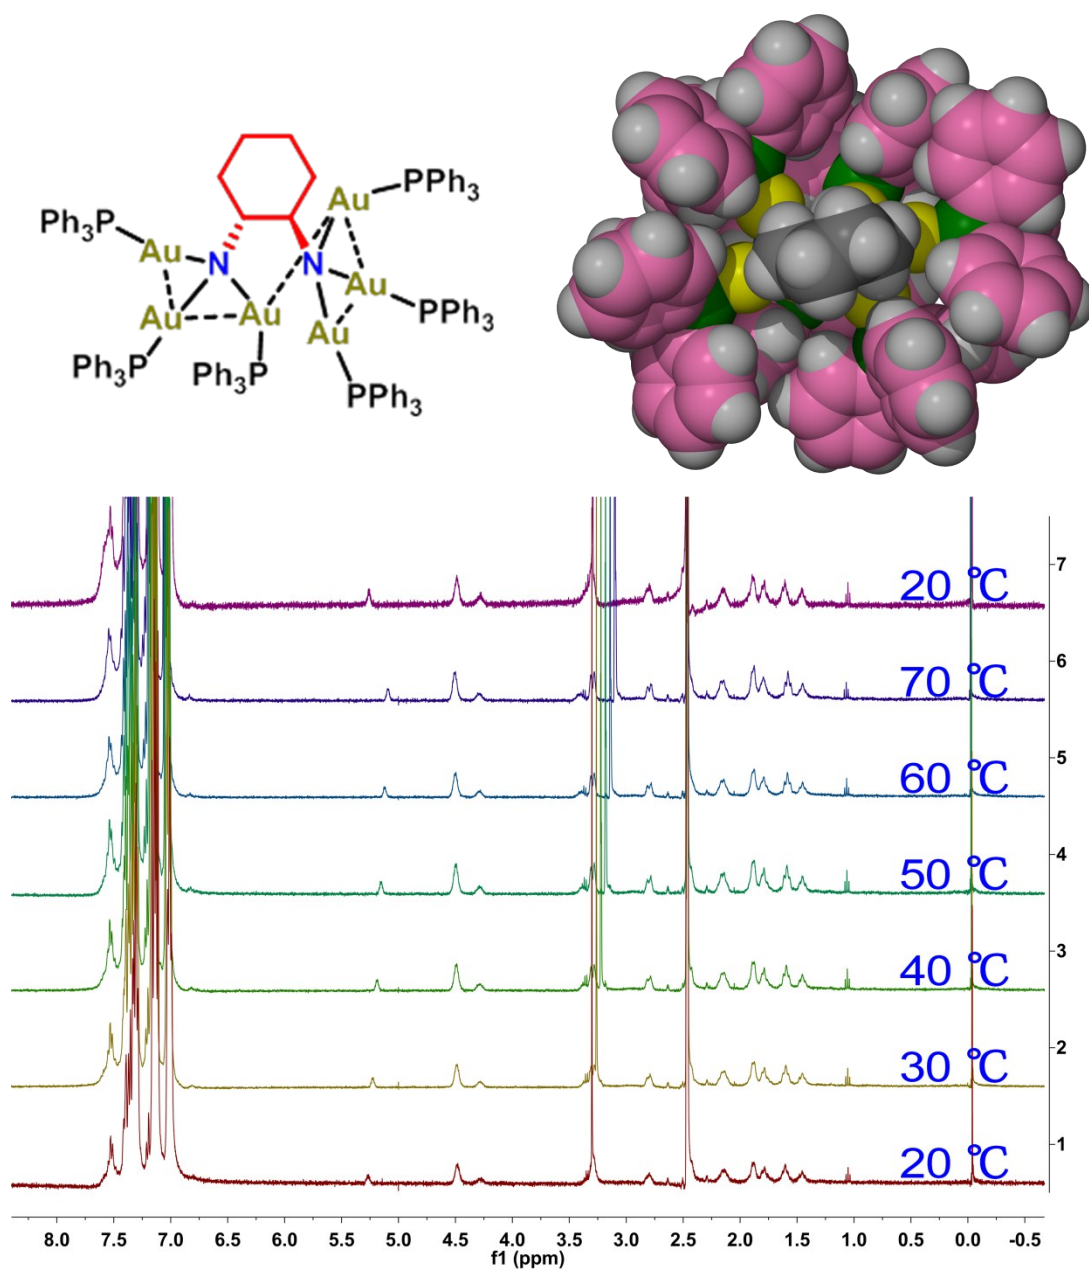

**Fig. S13** Variable temperature <sup>1</sup>H NMR spectra (DMSO-d<sub>6</sub>) of **3-(R,R)** from 20 to 70 °C and back to 20 °C. The environment of the central diamino ligand **L**<sup>3</sup> is shown in a space-filling model based on the crystal structure of **3-(R,R)**.

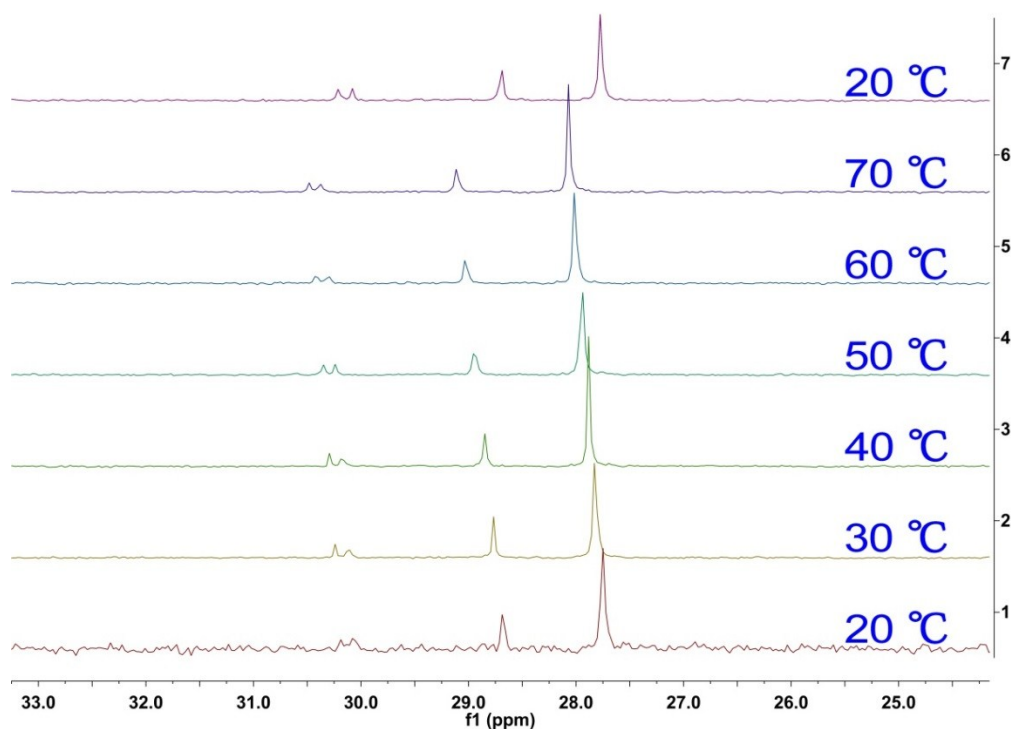

**Fig. S14** Variable temperature  $^{31}\text{P}$  NMR spectra (DMSO- $d_6$ ) of **3-(R,R)** from 20 to 70 °C and back to 20 °C.

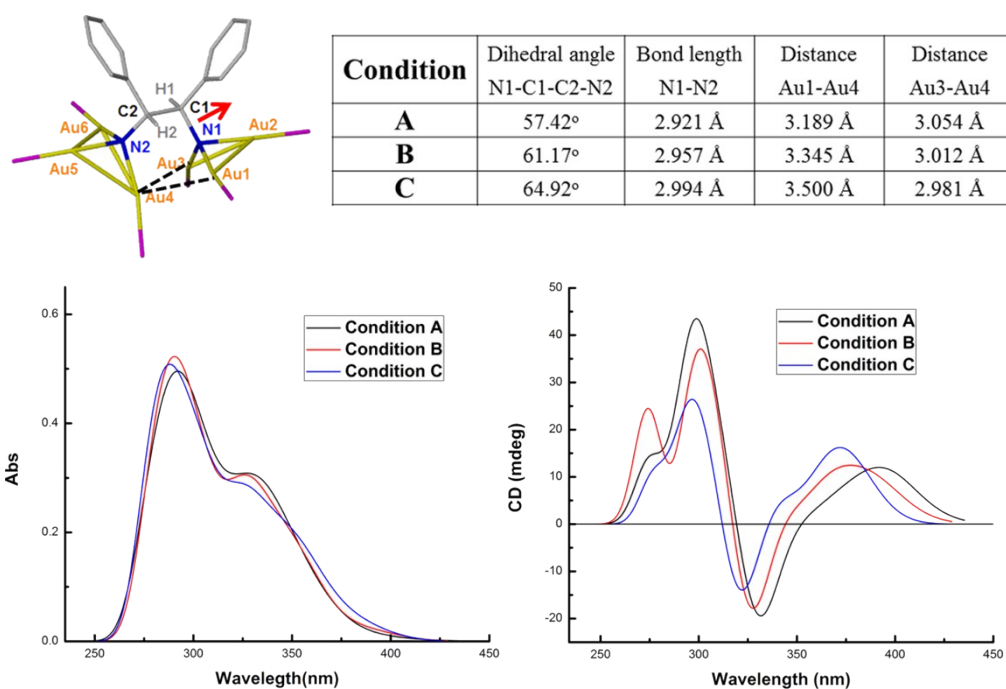

**Fig. S15** Theoretical simulation of UV-vis and CD spectra of a model cluster complex based on the crystal structure of **2-(R,R)**. The conformational change of the model cluster is conducted by enlarging the N-C-C-N dihedral angle of

the diamino ligand  $L^2$  from  $57.4^\circ$  (in **2-(R,R)**) through  $61.2^\circ$  to  $64.9^\circ$ . In this process, the two  $[N(AuPPh_3)_3]$  moieties keep intact.

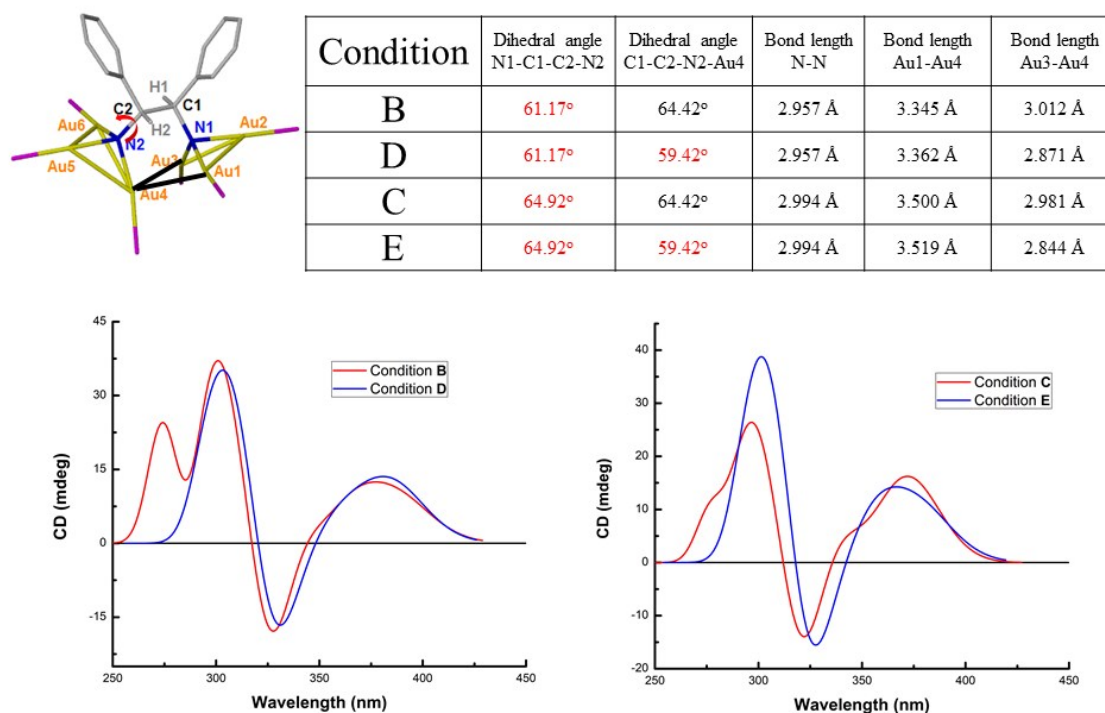

**Fig. S16** Theoretical simulation of CD spectra of a model cluster complex based on the crystal structure of **2-(R,R)**. The conformational change of the model cluster is conducted by enlarging the N1-C1-C2-N2 dihedral angle and decreasing the C1-C2-N2-Au4 angle. In this process, one of the two  $[N(AuPPh_3)_3]$  moieties is rotated around a N-C bond.

## Geometrical coordinates of the model complexes at condition A-E.

Condition A: N1-C1-C2-N2 dihedral angle is 57.42°.

|   |             |             |             |
|---|-------------|-------------|-------------|
| C | 0.63369500  | -0.09653900 | -2.12981300 |
| H | 0.35494300  | -1.03400900 | -2.09399300 |
| C | -0.67893700 | 0.75997500  | -2.14534600 |
| H | -0.43015400 | 1.70744300  | -2.13580600 |
| C | 1.43387900  | 0.06438300  | -3.36336400 |
| C | 1.86936000  | 1.31140000  | -3.87823100 |
| H | 1.64472000  | 2.08929500  | -3.42093700 |
| C | 2.63671200  | 1.41275900  | -5.06711000 |
| H | 2.96293600  | 2.23131500  | -5.36263000 |
| C | 2.87798500  | 0.25885500  | -5.76579600 |
| H | 3.35006300  | 0.31043300  | -6.56701500 |
| C | 2.45077300  | -0.97145900 | -5.32906200 |
| H | 2.63527200  | -1.73094300 | -5.83302600 |
| C | 1.74617200  | -1.08837600 | -4.14228700 |
| H | 1.47311000  | -1.92785900 | -3.84975700 |
| C | -1.52576300 | 0.49072800  | -3.41475700 |
| C | -2.22866400 | 1.53833300  | -3.94852900 |
| H | -2.14182600 | 2.38875200  | -3.58358800 |
| C | -3.07420200 | 1.33630300  | -5.04019000 |
| H | -3.56652200 | 2.04552100  | -5.38282300 |
| C | -3.18171600 | 0.09213700  | -5.60804800 |
| H | -3.73676800 | -0.03243300 | -6.34449600 |
| C | -2.45720100 | -0.99607400 | -5.08314000 |
| H | -2.52919600 | -1.84127900 | -5.46397300 |
| C | -1.63826000 | -0.78013100 | -3.99119500 |
| H | -1.15529600 | -1.49048500 | -3.63400000 |
| C | 0.87148800  | 5.47891600  | -0.37173800 |
| C | -0.39996700 | 5.01089600  | -0.82074300 |
| H | -0.50418600 | 4.10963000  | -1.02012300 |
| C | -1.47712000 | 5.85929100  | -0.96548700 |
| H | -2.26303600 | 5.55417700  | -1.35756300 |
| C | -1.37996500 | 7.17410800  | -0.52183600 |
| H | -2.12835300 | 7.72590100  | -0.51157500 |
| C | -0.08157500 | 7.67669700  | -0.07103600 |
| H | 0.02869100  | 8.57180400  | 0.15485600  |
| C | 0.98634000  | 6.78336200  | 0.01350100  |
| H | 1.80167100  | 7.08671500  | 0.34268300  |
| C | 3.22870500  | 4.84033000  | -1.81207200 |
| C | 4.07001400  | 3.87684500  | -2.41900500 |
| H | 4.14295100  | 3.02657300  | -2.05040300 |
| C | 4.77728700  | 4.19920200  | -3.54642100 |
| H | 5.31565300  | 3.54446400  | -3.92971800 |

|   |            |             |             |
|---|------------|-------------|-------------|
| C | 4.73627000 | 5.40689700  | -4.12993900 |
| H | 5.22836100 | 5.60397800  | -4.89348600 |
| C | 3.88954600 | 6.36735800  | -3.50359500 |
| H | 3.84689700 | 7.22577200  | -3.86047100 |
| C | 3.14282300 | 6.08210300  | -2.40742900 |
| H | 2.56960700 | 6.72536000  | -2.05718300 |
| C | 3.25076500 | 4.79352200  | 1.08849600  |
| C | 2.64009500 | 5.09879200  | 2.31538900  |
| H | 1.71427500 | 5.17806200  | 2.35441500  |
| C | 3.39517400 | 5.28760400  | 3.48826600  |
| H | 2.99270900 | 5.45018000  | 4.31055800  |
| C | 4.83218000 | 5.21620500  | 3.34442600  |
| H | 5.37643600 | 5.41560900  | 4.07351900  |
| C | 5.38889000 | 4.87027500  | 2.18966000  |
| H | 6.31011900 | 4.74247100  | 2.17106300  |
| C | 4.67767700 | 4.68727300  | 0.99785300  |
| H | 5.10700300 | 4.50811900  | 0.19313900  |
| C | 6.64108600 | -0.55699800 | 0.29777200  |
| C | 6.18440800 | 0.47175900  | 1.13277400  |
| H | 5.36348800 | 0.87331900  | 0.95983700  |
| C | 6.94042800 | 0.89874200  | 2.21429400  |
| H | 6.64251600 | 1.58588800  | 2.76320100  |
| C | 8.17199800 | 0.26274800  | 2.45408200  |
| H | 8.70691400 | 0.56564200  | 3.15208400  |
| C | 8.60097600 | -0.77793500 | 1.70113400  |
| H | 9.40540500 | -1.19923300 | 1.90508400  |
| C | 7.82831700 | -1.22476200 | 0.60415400  |
| H | 8.10650800 | -1.95165700 | 0.09336600  |
| C | 6.40616600 | -0.49214200 | -2.59208100 |
| C | 5.70933700 | 0.17709800  | -3.53297300 |
| H | 4.82859300 | 0.42346800  | -3.36152900 |
| C | 6.30021800 | 0.51326100  | -4.78093400 |
| H | 5.78050200 | 0.87979300  | -5.46023000 |
| C | 7.63895300 | 0.29352500  | -4.97659400 |
| H | 8.07486700 | 0.58644600  | -5.74500100 |
| C | 8.30167700 | -0.37895600 | -3.98761000 |
| H | 9.20192000 | -0.57560200 | -4.11787300 |
| C | 7.73062200 | -0.77370300 | -2.84075100 |
| H | 8.23120800 | -1.23950500 | -2.21043000 |
| C | 5.56663000 | -2.85940100 | -1.14783200 |
| C | 4.99303500 | -3.40580600 | -2.30024700 |
| H | 4.71278200 | -2.84929300 | -2.99099300 |
| C | 4.84369600 | -4.78870100 | -2.41358600 |
| H | 4.48612200 | -5.15114700 | -3.19043900 |

|   |             |             |             |
|---|-------------|-------------|-------------|
| C | 5.22866400  | -5.63699800 | -1.36422000 |
| H | 5.09708800  | -6.55579700 | -1.42498700 |
| C | 5.78641400  | -5.09695000 | -0.27283900 |
| H | 6.11188000  | -5.66324500 | 0.38860600  |
| C | 5.90299200  | -3.68985700 | -0.08592600 |
| H | 6.19481600  | -3.33805300 | 0.72441900  |
| C | 3.19666400  | -3.22120400 | 2.57061500  |
| C | 4.01259400  | -2.10245500 | 2.78734900  |
| H | 3.69671300  | -1.26304200 | 2.53876800  |
| C | 5.25799500  | -2.19567600 | 3.35078600  |
| H | 5.76000700  | -1.43072700 | 3.51333300  |
| C | 5.75994800  | -3.45476500 | 3.67597100  |
| H | 6.61984100  | -3.53909900 | 4.01873500  |
| C | 4.96448900  | -4.58939000 | 3.48407800  |
| H | 5.26747300  | -5.42262900 | 3.76548600  |
| C | 3.72088400  | -4.47247300 | 2.87196400  |
| H | 3.23599500  | -5.23864200 | 2.66196900  |
| C | 0.51150100  | -3.11609100 | 3.50772400  |
| C | -0.83915900 | -2.72991500 | 3.46461900  |
| H | -1.18825300 | -2.39335300 | 2.67189300  |
| C | -1.66333000 | -2.84065700 | 4.57570400  |
| H | -2.56224600 | -2.60730500 | 4.52722700  |
| C | -1.10918200 | -3.31404600 | 5.77750100  |
| H | -1.63942200 | -3.38224700 | 6.53927000  |
| C | 0.21653200  | -3.67577600 | 5.82638100  |
| H | 0.57487000  | -3.98958800 | 6.62579000  |
| C | 1.02488000  | -3.58336500 | 4.71609600  |
| H | 1.91914700  | -3.83260800 | 4.77280000  |
| C | 1.13643100  | -4.61616800 | 1.13613400  |
| C | 0.05005300  | -5.39746500 | 1.48611100  |
| H | -0.53060500 | -5.12499300 | 2.15993400  |
| C | -0.16125300 | -6.61266300 | 0.80695600  |
| H | -0.89631200 | -7.14338800 | 1.01344200  |
| C | 0.73409000  | -7.01369700 | -0.17156700 |
| H | 0.59041300  | -7.81206600 | -0.62850800 |
| C | 1.77931700  | -6.28136600 | -0.46152200 |
| H | 2.38684000  | -6.58283100 | -1.09862700 |
| C | 2.00301200  | -5.03731000 | 0.17557200  |
| H | 2.73431300  | -4.51284400 | -0.05806600 |
| C | -1.85056100 | 0.75505400  | 4.17558100  |
| C | -1.72820100 | 0.74415600  | 5.54817200  |
| H | -0.95557500 | 1.07728500  | 5.94406800  |
| C | -2.73686300 | 0.24411400  | 6.33912900  |
| H | -2.64544900 | 0.24038000  | 7.26477100  |

|   |             |             |             |
|---|-------------|-------------|-------------|
| C | -3.91538600 | -0.26386500 | 5.74127700  |
| H | -4.59219100 | -0.63517700 | 6.26060500  |
| C | -4.03774500 | -0.19245000 | 4.32598400  |
| H | -4.83153100 | -0.45810000 | 3.91978700  |
| C | -2.99493600 | 0.26669000  | 3.54677300  |
| H | -3.05539800 | 0.25071100  | 2.61884000  |
| C | -0.61853600 | 3.25579500  | 3.41444200  |
| C | -0.14118800 | 3.78604900  | 4.62765100  |
| H | 0.25042200  | 3.23781600  | 5.26841100  |
| C | -0.27408500 | 5.16911200  | 4.84332000  |
| H | 0.04433900  | 5.53626400  | 5.63718200  |
| C | -0.85373700 | 5.98525000  | 3.92490400  |
| H | -0.95019100 | 6.89103000  | 4.10641400  |
| C | -1.31117300 | 5.46176900  | 2.68955500  |
| H | -1.68089500 | 6.02126200  | 2.04600800  |
| C | -1.19494300 | 4.07418700  | 2.45747800  |
| H | -1.50532900 | 3.70844200  | 1.66037300  |
| C | 1.06336100  | 0.99645500  | 3.85145400  |
| C | 1.25774600  | 0.00525800  | 4.80516700  |
| H | 0.53469500  | -0.51265400 | 5.07950700  |
| C | 2.48643900  | -0.22282100 | 5.35074600  |
| H | 2.58397400  | -0.85679800 | 6.02430500  |
| C | 3.62314700  | 0.50141100  | 4.89297700  |
| H | 4.47303300  | 0.32448600  | 5.22942200  |
| C | 3.43130800  | 1.45025800  | 3.96238200  |
| H | 4.15793800  | 1.96038700  | 3.68397300  |
| C | 2.17827200  | 1.69914600  | 3.39489100  |
| H | 2.08735200  | 2.33022600  | 2.71774000  |
| C | -6.59536400 | 1.24618900  | -1.92938200 |
| C | -7.90287700 | 0.73577200  | -1.79145800 |
| H | -8.26326600 | 0.60108100  | -0.94537500 |
| C | -8.65071200 | 0.43333100  | -2.92546000 |
| H | -9.49237200 | 0.04688300  | -2.84129000 |
| C | -8.11784500 | 0.72236100  | -4.22139000 |
| H | -8.60761800 | 0.54144200  | -4.98982500 |
| C | -6.86836900 | 1.27062100  | -4.29677300 |
| H | -6.51186000 | 1.47610800  | -5.13204900 |
| C | -6.11880200 | 1.52920200  | -3.15591200 |
| H | -5.27201300 | 1.90341100  | -3.24149500 |
| C | -6.00543100 | 3.35679300  | -0.00770000 |
| C | -7.30034700 | 3.83485900  | -0.06750600 |
| H | -8.00023700 | 3.25290600  | -0.26039200 |
| C | -7.56193600 | 5.16468100  | 0.15549100  |
| H | -8.43675500 | 5.47210200  | 0.08455000  |



|   |             |             |             |
|---|-------------|-------------|-------------|
| C | -6.56625400 | 6.05176200  | 0.47814600  |
| H | -6.75639200 | 6.94180000  | 0.66942100  |
| C | -5.23200200 | 5.55884700  | 0.50894600  |
| H | -4.53211200 | 6.14080000  | 0.70183200  |
| C | -4.95967500 | 4.22651400  | 0.25606900  |
| H | -4.08297800 | 3.91765600  | 0.26350500  |
| C | -6.30518600 | 0.58914900  | 0.84156700  |
| C | -6.31096100 | -0.78122900 | 0.65096400  |
| H | -5.90300900 | -1.13305300 | -0.10690600 |
| C | -6.89876100 | -1.62749400 | 1.54034800  |
| H | -6.89563100 | -2.54312000 | 1.37752400  |
| C | -7.50204400 | -1.13624000 | 2.68818500  |
| H | -7.91839300 | -1.71236700 | 3.28749500  |
| C | -7.47281500 | 0.22254100  | 2.92871600  |
| H | -7.85467900 | 0.56422600  | 3.70357200  |
| C | -6.87152700 | 1.08517800  | 2.01173100  |
| H | -6.85008800 | 1.99864000  | 2.18246700  |
| C | -4.52335600 | -3.37228600 | -1.77280800 |
| C | -4.75482100 | -2.32030900 | -2.66325000 |
| H | -4.08568100 | -1.68609500 | -2.78840300 |
| C | -5.92223600 | -2.18569800 | -3.35902000 |
| H | -6.00848800 | -1.52786600 | -4.01054000 |
| C | -6.99659400 | -3.05201100 | -3.07525600 |
| H | -7.82660200 | -2.92128900 | -3.47505500 |
| C | -6.80335700 | -4.07571500 | -2.21843800 |
| H | -7.49663000 | -4.68197600 | -2.08155700 |
| C | -5.61174900 | -4.26050200 | -1.53103100 |
| H | -5.52345900 | -4.95626600 | -0.92062000 |
| C | -3.46528700 | -4.33949400 | 0.65792700  |
| C | -3.95037100 | -3.52733900 | 1.66558700  |
| H | -3.90213900 | -2.60231500 | 1.58542900  |
| C | -4.50080100 | -4.09420700 | 2.78209100  |
| H | -4.82617700 | -3.54955500 | 3.46185000  |
| C | -4.57731200 | -5.49007800 | 2.91294900  |
| H | -4.97943200 | -5.87482400 | 3.65863600  |
| C | -4.05533800 | -6.26880900 | 1.93602700  |
| H | -4.07983800 | -7.19460000 | 2.02603300  |
| C | -3.46912400 | -5.69307300 | 0.76903200  |
| H | -3.10109400 | -6.22907300 | 0.10363300  |
| C | -1.91648900 | -4.59745400 | -1.86802100 |
| C | -2.37002600 | -5.79730900 | -2.43876200 |
| H | -3.25210900 | -6.06085800 | -2.30567200 |
| C | -1.53324200 | -6.58948100 | -3.19271200 |
| H | -1.83744600 | -7.40638300 | -3.51874400 |

|    |             |             |             |
|----|-------------|-------------|-------------|
| C  | -0.22113300 | -6.16604400 | -3.47040400 |
| H  | 0.33351700  | -6.67673600 | -4.01259500 |
| C  | 0.23704200  | -4.97357100 | -2.92260900 |
| H  | 1.10627100  | -4.68683100 | -3.08723500 |
| C  | -0.61703500 | -4.20863300 | -2.12298700 |
| H  | -0.30023200 | -3.41824400 | -1.75236800 |
| N  | 1.40189700  | 0.16597200  | -0.89377500 |
| N  | -1.50019800 | 0.48839600  | -0.97770600 |
| P  | 2.25831800  | 4.35649900  | -0.35517300 |
| P  | 5.56391700  | -1.05198200 | -1.06826500 |
| P  | 1.49680400  | -3.03798300 | 1.98071300  |
| P  | -0.53309100 | 1.45801400  | 3.11883400  |
| P  | -5.60103000 | 1.63117500  | -0.45119300 |
| P  | -2.97216400 | -3.52212800 | -0.87904500 |
| Au | 1.75128100  | 2.16703500  | -0.48437500 |
| Au | 3.44275400  | -0.33581300 | -0.98568000 |
| Au | 1.23704300  | -1.27377000 | 0.61488100  |
| Au | -0.82589500 | 0.95390500  | 0.94856900  |
| Au | -3.43331400 | 1.16780400  | -0.77350000 |
| Au | -2.09365300 | -1.46332300 | -0.73398200 |

**Condition B:** N1-C1-C2-N2 dihedral angle is 61.17°.

|   |             |             |             |
|---|-------------|-------------|-------------|
| C | 0.62993100  | -0.04457600 | -2.07772800 |
| H | 0.33723300  | -0.97752300 | -2.03560300 |
| C | -0.66905900 | 0.83255100  | -2.06615700 |
| H | -0.40601500 | 1.77397900  | -2.00135300 |
| C | 1.40650300  | 0.10348600  | -3.32786800 |
| C | 1.85071100  | 1.34338700  | -3.85237700 |
| H | 1.64801600  | 2.12480800  | -3.39086000 |
| C | 2.59446000  | 1.43242000  | -5.05713700 |
| H | 2.92729000  | 2.24567400  | -5.35984100 |
| C | 2.80278600  | 0.27473400  | -5.76015300 |
| H | 3.25870800  | 0.31871800  | -6.57112200 |
| C | 2.36546800  | -0.94860900 | -5.31394300 |
| H | 2.52734800  | -1.71099600 | -5.82128600 |
| C | 1.68415900  | -1.05419000 | -4.11259400 |
| H | 1.40408000  | -1.88920800 | -3.81398400 |
| C | -1.49980900 | 0.64616800  | -3.36081100 |
| C | -2.17813800 | 1.73234600  | -3.84717300 |
| H | -2.08407700 | 2.56022800  | -3.43522800 |
| C | -3.00937200 | 1.60341900  | -4.96068200 |
| H | -3.48534700 | 2.33800000  | -5.27149300 |
| C | -3.12692200 | 0.39374900  | -5.59696200 |

|   |             |             |             |
|---|-------------|-------------|-------------|
| H | -3.67214900 | 0.31822900  | -6.34728200 |
| C | -2.42746600 | -0.73283700 | -5.12133900 |
| H | -2.50635700 | -1.55489200 | -5.54864500 |
| C | -1.62261400 | -0.58960700 | -4.00718500 |
| H | -1.15623900 | -1.32596100 | -3.68203600 |
| C | 0.99249900  | 5.52672400  | -0.32780700 |
| C | -0.29532100 | 5.07876000  | -0.74981600 |
| H | -0.41790900 | 4.17921800  | -0.94651700 |
| C | -1.36175200 | 5.94403000  | -0.87236200 |
| H | -2.16043600 | 5.65129500  | -1.24771900 |
| C | -1.23457700 | 7.25722300  | -0.43150200 |
| H | -1.97378400 | 7.82076400  | -0.40582400 |
| C | 0.08075300  | 7.73932800  | -0.00828100 |
| H | 0.20984400  | 8.63262000  | 0.21480300  |
| C | 1.13597700  | 6.82925900  | 0.05428800  |
| H | 1.96271800  | 7.11975800  | 0.36614800  |
| C | 3.30861400  | 4.85076400  | -1.81693900 |
| C | 4.12169900  | 3.87401500  | -2.44090100 |
| H | 4.18892500  | 3.02276000  | -2.07348600 |
| C | 4.81016600  | 4.18497800  | -3.58306200 |
| H | 5.32997400  | 3.52175800  | -3.97723800 |
| C | 4.77598000  | 5.39307200  | -4.16619400 |
| H | 5.25499500  | 5.58223200  | -4.93999100 |
| C | 3.95784200  | 6.36688500  | -3.52271000 |
| H | 3.92126700  | 7.22580600  | -3.87904100 |
| C | 3.22986900  | 6.09363800  | -2.41098300 |
| H | 2.67434700  | 6.74592300  | -2.04911400 |
| C | 3.39077100  | 4.80409900  | 1.08255100  |
| C | 2.81086500  | 5.11917800  | 2.32182900  |
| H | 1.88743300  | 5.21306000  | 2.38022200  |
| C | 3.59326600  | 5.29624200  | 3.47851900  |
| H | 3.21075300  | 5.46529000  | 4.30898900  |
| C | 5.02563200  | 5.20214200  | 3.30461000  |
| H | 5.58814100  | 5.39305200  | 4.02203000  |
| C | 5.55246900  | 4.84727300  | 2.13859600  |
| H | 6.47097400  | 4.70493900  | 2.10074800  |
| C | 4.81361400  | 4.67532200  | 0.96205700  |
| H | 5.22308500  | 4.48927800  | 0.14860600  |
| C | 6.67890700  | -0.59940900 | 0.22357100  |
| C | 6.25613600  | 0.43657000  | 1.06745300  |
| H | 5.43820800  | 0.85101000  | 0.91157000  |
| C | 7.04131900  | 0.85174600  | 2.13266800  |
| H | 6.76586700  | 1.54360100  | 2.68735900  |
| C | 8.26745900  | 0.19642800  | 2.34689300  |

|   |             |             |             |
|---|-------------|-------------|-------------|
| H | 8.82161200  | 0.49095700  | 3.03337300  |
| C | 8.66407300  | -0.85102300 | 1.58563400  |
| H | 9.46585500  | -1.28493400 | 1.77287900  |
| C | 7.86161900  | -1.28578100 | 0.50532100  |
| H | 8.11752900  | -2.01706200 | -0.01082600 |
| C | 6.38447300  | -0.53133600 | -2.66075200 |
| C | 5.67870800  | 0.14866300  | -3.58715700 |
| H | 4.80575200  | 0.40893500  | -3.39740400 |
| C | 6.24851300  | 0.47524700  | -4.84740300 |
| H | 5.72051100  | 0.84982400  | -5.51583300 |
| C | 7.57921500  | 0.23437100  | -5.07098500 |
| H | 8.00348300  | 0.52024500  | -5.84851000 |
| C | 8.25184400  | -0.44832300 | -4.09578100 |
| H | 9.14594200  | -0.65917800 | -4.24479600 |
| C | 7.69881400  | -0.83381300 | -2.93700200 |
| H | 8.20509900  | -1.30735400 | -2.31708500 |
| C | 5.53816700  | -2.88480500 | -1.19803400 |
| C | 4.93197400  | -3.42228000 | -2.33789400 |
| H | 4.64611000  | -2.86152700 | -3.02288800 |
| C | 4.75848700  | -4.80266400 | -2.44738700 |
| H | 4.37902100  | -5.15955000 | -3.21638900 |
| C | 5.15194800  | -5.65675600 | -1.40590200 |
| H | 5.00464400  | -6.57337400 | -1.46343800 |
| C | 5.74092100  | -5.12539800 | -0.32672700 |
| H | 6.07121300  | -5.69664900 | 0.32803000  |
| C | 5.88358300  | -3.72028900 | -0.14300100 |
| H | 6.19785600  | -3.37300000 | 0.66087000  |
| C | 3.24130700  | -3.20852500 | 2.56947600  |
| C | 4.07915600  | -2.10276000 | 2.76849300  |
| H | 3.77141600  | -1.25850700 | 2.52617300  |
| C | 5.33447600  | -2.21553600 | 3.30573600  |
| H | 5.85179500  | -1.45858000 | 3.45733800  |
| C | 5.82320900  | -3.48233800 | 3.62095000  |
| H | 6.68866500  | -3.58017900 | 3.94564800  |
| C | 5.00609500  | -4.60429600 | 3.44634700  |
| H | 5.30172900  | -5.44216700 | 3.72175500  |
| C | 3.75192300  | -4.46786300 | 2.86038900  |
| H | 3.25070600  | -5.22631700 | 2.66099100  |
| C | 0.57838500  | -3.06087800 | 3.56263700  |
| C | -0.76662000 | -2.65343500 | 3.54767400  |
| H | -1.12691100 | -2.31153600 | 2.76227500  |
| C | -1.56894800 | -2.75096600 | 4.67585300  |
| H | -2.46488900 | -2.50346000 | 4.64612200  |
| C | -0.99725100 | -3.23284200 | 5.86600100  |

|   |             |             |             |
|---|-------------|-------------|-------------|
| H | -1.51240600 | -3.29253600 | 6.63875600  |
| C | 0.32332300  | -3.61544800 | 5.88724900  |
| H | 0.69335400  | -3.93474400 | 6.67912400  |
| C | 1.10956100  | -3.53599600 | 4.76021000  |
| H | 2.00077700  | -3.79931600 | 4.79827200  |
| C | 1.12968200  | -4.57103100 | 1.17921200  |
| C | 0.03869100  | -5.33502200 | 1.55228400  |
| H | -0.52333300 | -5.05330400 | 2.23800000  |
| C | -0.20596400 | -6.54684600 | 0.87831500  |
| H | -0.94481300 | -7.06586600 | 1.10043600  |
| C | 0.66221600  | -6.96212900 | -0.11856900 |
| H | 0.49640600  | -7.75820700 | -0.57199800 |
| C | 1.71255700  | -6.24643900 | -0.43074400 |
| H | 2.30174900  | -6.55756400 | -1.08029900 |
| C | 1.96917000  | -5.00596200 | 0.20089800  |
| H | 2.70359400  | -4.49314600 | -0.04828600 |
| C | -1.93998800 | 0.50394900  | 4.22698200  |
| C | -1.83943300 | 0.41671100  | 5.59861400  |
| H | -1.06813700 | 0.71540800  | 6.02351800  |
| C | -2.86794200 | -0.10915100 | 6.34607200  |
| H | -2.79117900 | -0.16451600 | 7.27139700  |
| C | -4.04452700 | -0.56493600 | 5.70397200  |
| H | -4.73501700 | -0.95289800 | 6.19218300  |
| C | -4.14348500 | -0.41496400 | 4.29300100  |
| H | -4.93474300 | -0.64539100 | 3.86117100  |
| C | -3.08164700 | 0.06887500  | 3.55555200  |
| H | -3.12773000 | 0.10418400  | 2.62732800  |
| C | -0.65808200 | 3.02209700  | 3.62152900  |
| C | -0.19185000 | 3.47806500  | 4.86877600  |
| H | 0.18120500  | 2.88967700  | 5.48450400  |
| C | -0.30698700 | 4.84936900  | 5.15741000  |
| H | 0.00447100  | 5.16778200  | 5.97473400  |
| C | -0.85957500 | 5.72331000  | 4.27625300  |
| H | -0.94502900 | 6.61935800  | 4.50534300  |
| C | -1.30544800 | 5.27498300  | 3.00756500  |
| H | -1.65640400 | 5.87441200  | 2.38999500  |
| C | -1.20678500 | 3.90032500  | 2.70205600  |
| H | -1.51013400 | 3.58336300  | 1.88169100  |
| C | 0.98202300  | 0.71559900  | 3.95990100  |
| C | 1.14620800  | -0.32883000 | 4.86103300  |
| H | 0.41110100  | -0.84913600 | 5.09597700  |
| C | 2.36253200  | -0.60590000 | 5.41162300  |
| H | 2.43975700  | -1.27693700 | 6.05105000  |
| C | 3.51723500  | 0.12367400  | 5.01093300  |

|   |             |             |             |
|---|-------------|-------------|-------------|
| H | 4.35891800  | -0.08489000 | 5.34986600  |
| C | 3.35458500  | 1.12452600  | 4.13061500  |
| H | 4.09321400  | 1.63722400  | 3.89123800  |
| C | 2.11458600  | 1.42395200  | 3.55891800  |
| H | 2.04398700  | 2.09218500  | 2.91584500  |
| C | -6.58003700 | 1.40157200  | -1.91216800 |
| C | -7.89720200 | 0.90555600  | -1.82171700 |
| H | -8.27288200 | 0.73103200  | -0.98968100 |
| C | -8.63162400 | 0.67709900  | -2.98151100 |
| H | -9.48030900 | 0.30026400  | -2.93104400 |
| C | -8.07406900 | 1.02731700  | -4.25170800 |
| H | -8.55438900 | 0.89622000  | -5.03605900 |
| C | -6.81533300 | 1.55866100  | -4.27852100 |
| H | -6.44262100 | 1.80334500  | -5.09597200 |
| C | -6.07995700 | 1.74292800  | -3.11424100 |
| H | -5.22630900 | 2.10753800  | -3.16670900 |
| C | -5.98826300 | 3.39515500  | 0.13012600  |
| C | -7.27462500 | 3.89655300  | 0.07715700  |
| H | -7.98019800 | 3.33725600  | -0.15752100 |
| C | -7.51935100 | 5.21637600  | 0.36829300  |
| H | -8.38814700 | 5.54123900  | 0.30117300  |
| C | -6.51543900 | 6.06851600  | 0.75354700  |
| H | -6.69494900 | 6.94982600  | 0.99013500  |
| C | -5.18952100 | 5.55323000  | 0.77733400  |
| H | -4.48394800 | 6.11252700  | 1.01201300  |
| C | -4.93362800 | 4.23234700  | 0.45639000  |
| H | -4.06197600 | 3.90946000  | 0.46005500  |
| C | -6.34358700 | 0.59074000  | 0.82292000  |
| C | -6.36729000 | -0.76702400 | 0.55793900  |
| H | -5.95287900 | -1.08378300 | -0.21180100 |
| C | -6.98187600 | -1.65066800 | 1.39108600  |
| H | -6.99016800 | -2.55605500 | 1.17872700  |
| C | -7.59558100 | -1.21268900 | 2.55485200  |
| H | -8.03006400 | -1.81366800 | 3.11564600  |
| C | -7.54939300 | 0.13041200  | 2.86940000  |
| H | -7.93814500 | 0.43570800  | 3.65593500  |
| C | -6.92063800 | 1.03168100  | 2.00978800  |
| H | -6.88794100 | 1.93408300  | 2.23029500  |
| C | -4.58153100 | -3.25137300 | -1.97639700 |
| C | -4.78285500 | -2.14909300 | -2.81160200 |
| H | -4.10221900 | -1.51988800 | -2.89206800 |
| C | -5.93698000 | -1.95818900 | -3.51631900 |
| H | -6.00290700 | -1.26471100 | -4.13227600 |
| C | -7.02877800 | -2.82119100 | -3.29616200 |

|    |             |             |             |
|----|-------------|-------------|-------------|
| H  | -7.85029600 | -2.65564300 | -3.70056700 |
| C  | -6.86471200 | -3.89280400 | -2.49355700 |
| H  | -7.56923300 | -4.49434800 | -2.40021900 |
| C  | -5.68703500 | -4.13374100 | -1.79956100 |
| H  | -5.61900200 | -4.86289500 | -1.22668200 |
| C  | -3.57675700 | -4.36580700 | 0.41357000  |
| C  | -4.06518400 | -3.60174700 | 1.45661000  |
| H  | -4.00157300 | -2.67463600 | 1.42765200  |
| C  | -4.64171600 | -4.21935200 | 2.53228200  |
| H  | -4.96939700 | -3.70717000 | 3.23576000  |
| C  | -4.74158900 | -5.61885000 | 2.58580800  |
| H  | -5.16122800 | -6.03691600 | 3.30337500  |
| C  | -4.21625400 | -6.35179800 | 1.57582500  |
| H  | -4.25630500 | -7.28059200 | 1.61492700  |
| C  | -3.60301600 | -5.72318000 | 0.45075900  |
| H  | -3.23278500 | -6.22818900 | -0.23727700 |
| C  | -1.99250500 | -4.51140700 | -2.09933300 |
| C  | -2.45527300 | -5.67110700 | -2.74123100 |
| H  | -3.34326500 | -5.92724100 | -2.63583400 |
| C  | -1.61892000 | -6.43462900 | -3.52464200 |
| H  | -1.93039500 | -7.22765600 | -3.89915200 |
| C  | -0.29628800 | -6.01795300 | -3.75930400 |
| H  | 0.25896500  | -6.50737800 | -4.32017100 |
| C  | 0.17136600  | -4.86445400 | -3.14064700 |
| H  | 1.04735700  | -4.58325100 | -3.27645900 |
| C  | -0.68341100 | -4.13031900 | -2.31337800 |
| H  | -0.36044700 | -3.36638200 | -1.89560700 |
| N  | 1.42793800  | 0.20598200  | -0.85820300 |
| N  | -1.51265300 | 0.51135400  | -0.92739000 |
| P  | 2.36148700  | 4.38255700  | -0.33976900 |
| P  | 5.56564400  | -1.07755500 | -1.11932900 |
| P  | 1.53255000  | -2.99859000 | 2.01526000  |
| P  | -0.59546200 | 1.24183500  | 3.22980200  |
| P  | -5.60333300 | 1.68981800  | -0.40057200 |
| P  | -3.04707200 | -3.47439500 | -1.06911700 |
| Au | 1.81736600  | 2.20134800  | -0.45721800 |
| Au | 3.45824600  | -0.32797500 | -0.99263600 |
| Au | 1.27206800  | -1.23072500 | 0.65429600  |
| Au | -0.86172800 | 0.86086500  | 1.03119500  |
| Au | -3.43814200 | 1.20974300  | -0.71531100 |
| Au | -2.13961100 | -1.44089400 | -0.79913300 |

**Condition C:** N1-C1-C2-N2 dihedral angle is 64.92°.

|   |             |             |             |
|---|-------------|-------------|-------------|
| C | 0.62688800  | 0.01671800  | -2.02227900 |
| H | 0.32273700  | -0.91251000 | -1.97910500 |
| C | -0.65973700 | 0.91085700  | -1.97787800 |
| H | -0.38462200 | 1.84274700  | -1.85309000 |
| C | 1.37841800  | 0.16186500  | -3.28797000 |
| C | 1.82779800  | 1.39885300  | -3.81494300 |
| H | 1.64547600  | 2.18015300  | -3.34480300 |
| C | 2.54669800  | 1.48514400  | -5.03489100 |
| H | 2.88379100  | 2.29569600  | -5.34011300 |
| C | 2.72445700  | 0.32896600  | -5.74870100 |
| H | 3.16345500  | 0.37169700  | -6.56902100 |
| C | 2.28051000  | -0.89109700 | -5.30006200 |
| H | 2.42130200  | -1.65255400 | -5.81503300 |
| C | 1.62373600  | -0.99473700 | -4.08496000 |
| H | 1.33899900  | -1.82772500 | -3.78508500 |
| C | -1.47238300 | 0.81414500  | -3.29365400 |
| C | -2.12767100 | 1.93729200  | -3.72446600 |
| H | -2.02859100 | 2.73773400  | -3.26250200 |
| C | -2.94286900 | 1.88716900  | -4.85601900 |
| H | -3.40354500 | 2.64593200  | -5.12955400 |
| C | -3.06721300 | 0.71933900  | -5.56502200 |
| H | -3.60147800 | 0.69667700  | -6.32660000 |
| C | -2.39119600 | -0.44381600 | -5.14702200 |
| H | -2.47478400 | -1.23775500 | -5.62374400 |
| C | -1.60218500 | -0.37906200 | -4.01436700 |
| H | -1.15135900 | -1.14030400 | -3.72677000 |
| C | 1.10115200  | 5.57233300  | -0.24934500 |
| C | -0.20127300 | 5.14392600  | -0.64608600 |
| H | -0.34003600 | 4.24725800  | -0.84514700 |
| C | -1.25844300 | 6.02392400  | -0.74083200 |
| H | -2.06881700 | 5.74399100  | -1.10057300 |
| C | -1.10434600 | 7.33270200  | -0.29545100 |
| H | -1.83524900 | 7.90580500  | -0.25073400 |
| C | 0.22606000  | 7.79487400  | 0.10210200  |
| H | 0.37180700  | 8.68505300  | 0.32736500  |
| C | 1.27014500  | 6.87058300  | 0.13687600  |
| H | 2.10717800  | 7.14828500  | 0.43252100  |
| C | 3.37562200  | 4.87459800  | -1.79167400 |
| C | 4.16205400  | 3.89087900  | -2.43843100 |
| H | 4.22576800  | 3.03665900  | -2.07732500 |
| C | 4.82999200  | 4.19943700  | -3.59336200 |
| H | 5.33234500  | 3.53173700  | -4.00233000 |
| C | 4.79945000  | 5.41129200  | -4.16884300 |
| H | 5.26426600  | 5.59865900  | -4.95168200 |



|   |            |             |             |
|---|------------|-------------|-------------|
| C | 4.00834500 | 6.39202800  | -3.50247500 |
| H | 3.97561200 | 7.25344200  | -3.85311700 |
| C | 3.30076400 | 6.12188300  | -2.37691000 |
| H | 2.76187200 | 6.77931200  | -1.99953500 |
| C | 3.51922000 | 4.80976900  | 1.10507400  |
| C | 2.97024000 | 5.12518000  | 2.35827500  |
| H | 2.04960400 | 5.23091500  | 2.43702500  |
| C | 3.77952300 | 5.28506800  | 3.49885800  |
| H | 3.41717100 | 5.45426100  | 4.33829200  |
| C | 5.20645400 | 5.17306800  | 3.29368400  |
| H | 5.78669400 | 5.35229300  | 3.99990800  |
| C | 5.70341900 | 4.81814000  | 2.11464500  |
| H | 6.61892200 | 4.66390200  | 2.05626900  |
| C | 4.93731100 | 4.66290700  | 0.95331100  |
| H | 5.32674900 | 4.47626100  | 0.13021800  |
| C | 6.71581600 | -0.63157900 | 0.14534700  |
| C | 6.32507200 | 0.40490700  | 1.00391500  |
| H | 5.50959700 | 0.83103600  | 0.86797100  |
| C | 7.13835600 | 0.80338400  | 2.05432100  |
| H | 6.88410100 | 1.49554100  | 2.61867400  |
| C | 8.35994900 | 0.13066400  | 2.23846900  |
| H | 8.93255500 | 0.41379200  | 2.91452200  |
| C | 8.72615900 | -0.91743600 | 1.46300100  |
| H | 9.52590600 | -1.36300300 | 1.63053700  |
| C | 7.89502600 | -1.33517400 | 0.39776300  |
| H | 8.13004500 | -2.06672200 | -0.12785700 |
| C | 6.36061900 | -0.54262900 | -2.73155600 |
| C | 5.64431500 | 0.15208800  | -3.63875300 |
| H | 4.77917100 | 0.42275500  | -3.42882700 |
| C | 6.19130800 | 0.47853000  | -4.90910100 |
| H | 5.65415800 | 0.86398500  | -5.56392000 |
| C | 7.51358400 | 0.22140500  | -5.16257500 |
| H | 7.92488200 | 0.50622200  | -5.94742400 |
| C | 8.19777400 | -0.47585500 | -4.20589500 |
| H | 9.08558200 | -0.69763000 | -4.37527000 |
| C | 7.66459000 | -0.86082100 | -3.03767900 |
| H | 8.17767000 | -1.34465700 | -2.43145000 |
| C | 5.51450200 | -2.89328000 | -1.26420600 |
| C | 4.87692200 | -3.41597000 | -2.39377100 |
| H | 4.58396300 | -2.84746100 | -3.06931000 |
| C | 4.68272700 | -4.79327100 | -2.50724700 |
| H | 4.28215400 | -5.14057200 | -3.26990700 |
| C | 5.08697000 | -5.65861100 | -1.47926400 |
| H | 4.92625000 | -6.57284600 | -1.53876000 |

|   |             |             |             |
|---|-------------|-------------|-------------|
| C | 5.70595400  | -5.14145300 | -0.41003400 |
| H | 6.04254000  | -5.72086800 | 0.23426100  |
| C | 5.87125300  | -3.73946000 | -0.22154100 |
| H | 6.20727400  | -3.40109800 | 0.57732500  |
| C | 3.29473200  | -3.20880000 | 2.54992000  |
| C | 4.15133000  | -2.11540000 | 2.73708200  |
| H | 3.84976400  | -1.26573900 | 2.50616800  |
| C | 5.41625000  | -2.24792400 | 3.24658300  |
| H | 5.94675100  | -1.49877900 | 3.39127400  |
| C | 5.89467500  | -3.52291100 | 3.54411400  |
| H | 6.76550300  | -3.63409600 | 3.84958400  |
| C | 5.05911100  | -4.63292000 | 3.38082300  |
| H | 5.34936900  | -5.47623500 | 3.64511200  |
| C | 3.79461100  | -4.47647100 | 2.82272700  |
| H | 3.27916400  | -5.22704500 | 2.62989700  |
| C | 0.65589500  | -3.03181800 | 3.60089100  |
| C | -0.68356500 | -2.60654800 | 3.61712000  |
| H | -1.05599900 | -2.25529500 | 2.84157500  |
| C | -1.46278100 | -2.70010900 | 4.76171600  |
| H | -2.35577100 | -2.44061000 | 4.75263500  |
| C | -0.87221000 | -3.19650500 | 5.93658300  |
| H | -1.37145000 | -3.25393500 | 6.71988400  |
| C | 0.44329400  | -3.59665300 | 5.92730100  |
| H | 0.82590400  | -3.92547300 | 6.70923800  |
| C | 1.20620700  | -3.52096300 | 4.78409000  |
| H | 2.09444000  | -3.79626200 | 4.80151300  |
| C | 1.13582800  | -4.53505800 | 1.19773800  |
| C | 0.04297900  | -5.28674400 | 1.58988100  |
| H | -0.50042300 | -5.00166600 | 2.28908600  |
| C | -0.23220000 | -6.49123600 | 0.91454200  |
| H | -0.97298300 | -7.00174400 | 1.14957600  |
| C | 0.60881600  | -6.91207900 | -0.10308200 |
| H | 0.42272700  | -7.70321000 | -0.55729900 |
| C | 1.66168700  | -6.20850900 | -0.43374100 |
| H | 2.23263100  | -6.52356500 | -1.09754100 |
| C | 1.94829600  | -4.97527700 | 0.19918700  |
| H | 2.68399300  | -4.47075500 | -0.06284400 |
| C | -2.03473500 | 0.22777500  | 4.26468700  |
| C | -1.95716500 | 0.05768200  | 5.63002600  |
| H | -1.18860300 | 0.31907500  | 6.08350700  |
| C | -3.00464200 | -0.49629800 | 6.32927700  |
| H | -2.94333900 | -0.60769900 | 7.25069700  |
| C | -4.17715600 | -0.89553900 | 5.64356300  |
| H | -4.88065200 | -1.30150500 | 6.09735300  |

|   |             |             |             |
|---|-------------|-------------|-------------|
| C | -4.25162800 | -0.66051500 | 4.24272700  |
| H | -5.03908400 | -0.85305800 | 3.78610500  |
| C | -3.17157600 | -0.14957100 | 3.55145800  |
| H | -3.20244000 | -0.05847400 | 2.62640700  |
| C | -0.70832600 | 2.75808300  | 3.82982400  |
| C | -0.25559800 | 3.13212100  | 5.10890100  |
| H | 0.09939100  | 2.50268600  | 5.69395400  |
| C | -0.35611900 | 4.48540800  | 5.47707000  |
| H | -0.05323800 | 4.75000700  | 6.31651100  |
| C | -0.88240300 | 5.41830900  | 4.64143400  |
| H | -0.95894700 | 6.30033000  | 4.92226400  |
| C | -1.31433000 | 5.05286800  | 3.34171900  |
| H | -1.64704000 | 5.69310300  | 2.75581600  |
| C | -1.23005700 | 3.69748200  | 2.95626000  |
| H | -1.52476400 | 3.43439100  | 2.11399000  |
| C | 0.89381400  | 0.41137800  | 4.05454500  |
| C | 1.02908200  | -0.68709000 | 4.89412500  |
| H | 0.28314400  | -1.20943400 | 5.08656300  |
| C | 2.23253500  | -1.01448100 | 5.44537700  |
| H | 2.29022800  | -1.72341100 | 6.04472000  |
| C | 3.40352800  | -0.27966200 | 5.10628200  |
| H | 4.23673400  | -0.52051400 | 5.44474900  |
| C | 3.26885600  | 0.77405300  | 4.28490000  |
| H | 4.01828000  | 1.28901400  | 4.08763600  |
| C | 2.04238100  | 1.12536400  | 3.71355900  |
| H | 1.99133000  | 1.83161400  | 3.11051000  |
| C | -6.56388300 | 1.55769900  | -1.87885000 |
| C | -7.88912000 | 1.07685700  | -1.83790900 |
| H | -8.28034400 | 0.85880500  | -1.02349200 |
| C | -8.60818500 | 0.92870000  | -3.02014600 |
| H | -9.46274800 | 0.56221300  | -3.00497900 |
| C | -8.02572400 | 1.34544800  | -4.25868600 |
| H | -8.49533700 | 1.26836900  | -5.05657400 |
| C | -6.75942000 | 1.85863900  | -4.23487900 |
| H | -6.37041300 | 2.14589600  | -5.03059600 |
| C | -6.04009000 | 1.96240800  | -3.05078600 |
| H | -5.18070500 | 2.31673700  | -3.06860500 |
| C | -5.97675600 | 3.41733800  | 0.28737900  |
| C | -7.25498400 | 3.94010300  | 0.24513800  |
| H | -7.96449500 | 3.40631500  | -0.03304000 |
| C | -7.48582500 | 5.24378800  | 0.61079000  |
| H | -8.34882400 | 5.58497000  | 0.55015200  |
| C | -6.47633600 | 6.05647600  | 1.06120100  |
| H | -6.64724000 | 6.92474300  | 1.34722700  |

|   |             |             |             |
|---|-------------|-------------|-------------|
| C | -5.15829300 | 5.52099700  | 1.07408100  |
| H | -4.44878100 | 6.05478500  | 1.35225900  |
| C | -4.91582900 | 4.21785900  | 0.67878000  |
| H | -4.04894200 | 3.88237800  | 0.67624400  |
| C | -6.38217500 | 0.58231000  | 0.80623100  |
| C | -6.42064800 | -0.75680000 | 0.46039600  |
| H | -5.99855300 | -1.03338900 | -0.32057000 |
| C | -7.06065300 | -1.67914800 | 1.23003600  |
| H | -7.07823000 | -2.57009000 | 0.96394100  |
| C | -7.68654900 | -1.30201900 | 2.40852600  |
| H | -8.13822300 | -1.92872800 | 2.92589200  |
| C | -7.62658700 | 0.01917600  | 2.80329600  |
| H | -8.02345400 | 0.28294100  | 3.60072700  |
| C | -6.97175000 | 0.96047700  | 2.00850500  |
| H | -6.92994400 | 1.84759100  | 2.28291900  |
| C | -4.62983200 | -3.11245300 | -2.19057700 |
| C | -4.80246600 | -1.95960600 | -2.96146100 |
| H | -4.11191400 | -1.33693900 | -2.99403500 |
| C | -5.94249400 | -1.70998600 | -3.67075600 |
| H | -5.98895100 | -0.98022100 | -4.24516500 |
| C | -7.04959900 | -2.56819000 | -3.51886900 |
| H | -7.86220900 | -2.36668100 | -3.92494900 |
| C | -6.91326900 | -3.68793600 | -2.77925400 |
| H | -7.62751800 | -4.28340300 | -2.73254100 |
| C | -5.75022400 | -3.98720800 | -2.08329000 |
| H | -5.70147800 | -4.75005400 | -1.55397500 |
| C | -3.67874300 | -4.38180500 | 0.14344300  |
| C | -4.17291800 | -3.67389800 | 1.22276800  |
| H | -4.09590500 | -2.74775500 | 1.25012600  |
| C | -4.77500400 | -4.34568700 | 2.25091400  |
| H | -5.10660600 | -3.87139700 | 2.97870300  |
| C | -4.89526100 | -5.74425000 | 2.21935100  |
| H | -5.33202500 | -6.19792700 | 2.90432800  |
| C | -4.36427600 | -6.42361800 | 1.17543100  |
| H | -4.41791900 | -7.35239400 | 1.15845000  |
| C | -3.72455500 | -5.73844700 | 0.09919100  |
| H | -3.35055800 | -6.20712900 | -0.61211900 |
| C | -2.05704500 | -4.40137500 | -2.34963600 |
| C | -2.52574100 | -5.51385300 | -3.06644100 |
| H | -3.41878400 | -5.76254400 | -2.98983700 |
| C | -1.68782700 | -6.24183700 | -3.88138000 |
| H | -2.00437700 | -7.00647500 | -4.30716000 |
| C | -0.35594600 | -5.83169700 | -4.07091100 |
| H | 0.20123300  | -6.29513700 | -4.65158900 |

|    |             |             |             |
|----|-------------|-------------|-------------|
| C  | 0.11791600  | -4.72410000 | -3.37760100 |
| H  | 0.99979500  | -4.44840100 | -3.48324600 |
| C  | -0.73952400 | -4.02778000 | -2.52091500 |
| H  | -0.41257900 | -3.29491900 | -2.05352000 |
| N  | 1.45409900  | 0.24951600  | -0.81879900 |
| N  | -1.52568400 | 0.53514700  | -0.87307600 |
| P  | 2.45418100  | 4.41025800  | -0.29713900 |
| P  | 5.56777000  | -1.08704700 | -1.17597900 |
| P  | 1.57745200  | -2.97303300 | 2.03373900  |
| P  | -0.66438900 | 1.00351600  | 3.33357300  |
| P  | -5.60733200 | 1.74101500  | -0.33827900 |
| P  | -3.11321500 | -3.41183500 | -1.27531600 |
| Au | 1.87861400  | 2.23716200  | -0.41509500 |
| Au | 3.47375700  | -0.31043300 | -0.99982600 |
| Au | 1.31149700  | -1.19389100 | 0.68862100  |
| Au | -0.90106700 | 0.75789900  | 1.11241000  |
| Au | -3.44434400 | 1.24829800  | -0.64860200 |
| Au | -2.18181800 | -1.41171700 | -0.87092600 |

**Condition D:** N1-C1-C2-N2 dihedral angle is 61.17°. C1-C2-N2-Au4 dihedral angle is 59.42°.

|   |             |             |             |
|---|-------------|-------------|-------------|
| C | 0.62993100  | -0.04457600 | -2.07772800 |
| H | 0.33723300  | -0.97752300 | -2.03560300 |
| C | -0.66905900 | 0.83255100  | -2.06615700 |
| H | -0.40601500 | 1.77397900  | -2.00135300 |
| C | 1.40650300  | 0.10348600  | -3.32786800 |
| C | 1.85071100  | 1.34338700  | -3.85237700 |
| H | 1.64801600  | 2.12480800  | -3.39086000 |
| C | 2.59446000  | 1.43242000  | -5.05713700 |
| H | 2.92729000  | 2.24567400  | -5.35984100 |
| C | 2.80278600  | 0.27473400  | -5.76015300 |
| H | 3.25870800  | 0.31871800  | -6.57112200 |
| C | 2.36546800  | -0.94860900 | -5.31394300 |
| H | 2.52734800  | -1.71099600 | -5.82128600 |
| C | 1.68415900  | -1.05419000 | -4.11259400 |

|   |             |             |             |
|---|-------------|-------------|-------------|
| H | 1.40408000  | -1.88920800 | -3.81398400 |
| C | -1.49980900 | 0.64616800  | -3.36081100 |
| C | -2.17813800 | 1.73234600  | -3.84717300 |
| H | -2.08407700 | 2.56022800  | -3.43522800 |
| C | -3.00937200 | 1.60341900  | -4.96068200 |
| H | -3.48534700 | 2.33800000  | -5.27149300 |
| C | -3.12692200 | 0.39374900  | -5.59696200 |
| H | -3.67214900 | 0.31822900  | -6.34728200 |
| C | -2.42746600 | -0.73283700 | -5.12133900 |
| H | -2.50635700 | -1.55489200 | -5.54864500 |
| C | -1.62261400 | -0.58960700 | -4.00718500 |
| H | -1.15623900 | -1.32596100 | -3.68203600 |
| C | 0.99249900  | 5.52672400  | -0.32780700 |
| C | -0.29532100 | 5.07876000  | -0.74981600 |
| H | -0.41790900 | 4.17921800  | -0.94651700 |
| C | -1.36175200 | 5.94403000  | -0.87236200 |
| H | -2.16043600 | 5.65129500  | -1.24771900 |
| C | -1.23457700 | 7.25722300  | -0.43150200 |
| H | -1.97378400 | 7.82076400  | -0.40582400 |
| C | 0.08075300  | 7.73932800  | -0.00828100 |
| H | 0.20984400  | 8.63262000  | 0.21480300  |
| C | 1.13597700  | 6.82925900  | 0.05428800  |
| H | 1.96271800  | 7.11975800  | 0.36614800  |
| C | 3.30861400  | 4.85076400  | -1.81693900 |
| C | 4.12169900  | 3.87401500  | -2.44090100 |
| H | 4.18892500  | 3.02276000  | -2.07348600 |
| C | 4.81016600  | 4.18497800  | -3.58306200 |
| H | 5.32997400  | 3.52175800  | -3.97723800 |
| C | 4.77598000  | 5.39307200  | -4.16619400 |
| H | 5.25499500  | 5.58223200  | -4.93999100 |

|   |            |             |             |
|---|------------|-------------|-------------|
| C | 3.95784200 | 6.36688500  | -3.52271000 |
| H | 3.92126700 | 7.22580600  | -3.87904100 |
| C | 3.22986900 | 6.09363800  | -2.41098300 |
| H | 2.67434700 | 6.74592300  | -2.04911400 |
| C | 3.39077100 | 4.80409900  | 1.08255100  |
| C | 2.81086500 | 5.11917800  | 2.32182900  |
| H | 1.88743300 | 5.21306000  | 2.38022200  |
| C | 3.59326600 | 5.29624200  | 3.47851900  |
| H | 3.21075300 | 5.46529000  | 4.30898900  |
| C | 5.02563200 | 5.20214200  | 3.30461000  |
| H | 5.58814100 | 5.39305200  | 4.02203000  |
| C | 5.55246900 | 4.84727300  | 2.13859600  |
| H | 6.47097400 | 4.70493900  | 2.10074800  |
| C | 4.81361400 | 4.67532200  | 0.96205700  |
| H | 5.22308500 | 4.48927800  | 0.14860600  |
| C | 6.67890700 | -0.59940900 | 0.22357100  |
| C | 6.25613600 | 0.43657000  | 1.06745300  |
| H | 5.43820800 | 0.85101000  | 0.91157000  |
| C | 7.04131900 | 0.85174600  | 2.13266800  |
| H | 6.76586700 | 1.54360100  | 2.68735900  |
| C | 8.26745900 | 0.19642800  | 2.34689300  |
| H | 8.82161200 | 0.49095700  | 3.03337300  |
| C | 8.66407300 | -0.85102300 | 1.58563400  |
| H | 9.46585500 | -1.28493400 | 1.77287900  |
| C | 7.86161900 | -1.28578100 | 0.50532100  |
| H | 8.11752900 | -2.01706200 | -0.01082600 |
| C | 6.38447300 | -0.53133600 | -2.66075200 |
| C | 5.67870800 | 0.14866300  | -3.58715700 |
| H | 4.80575200 | 0.40893500  | -3.39740400 |
| C | 6.24851300 | 0.47524700  | -4.84740300 |

|   |            |             |             |
|---|------------|-------------|-------------|
| H | 5.72051100 | 0.84982400  | -5.51583300 |
| C | 7.57921500 | 0.23437100  | -5.07098500 |
| H | 8.00348300 | 0.52024500  | -5.84851000 |
| C | 8.25184400 | -0.44832300 | -4.09578100 |
| H | 9.14594200 | -0.65917800 | -4.24479600 |
| C | 7.69881400 | -0.83381300 | -2.93700200 |
| H | 8.20509900 | -1.30735400 | -2.31708500 |
| C | 5.53816700 | -2.88480500 | -1.19803400 |
| C | 4.93197400 | -3.42228000 | -2.33789400 |
| H | 4.64611000 | -2.86152700 | -3.02288800 |
| C | 4.75848700 | -4.80266400 | -2.44738700 |
| H | 4.37902100 | -5.15955000 | -3.21638900 |
| C | 5.15194800 | -5.65675600 | -1.40590200 |
| H | 5.00464400 | -6.57337400 | -1.46343800 |
| C | 5.74092100 | -5.12539800 | -0.32672700 |
| H | 6.07121300 | -5.69664900 | 0.32803000  |
| C | 5.88358300 | -3.72028900 | -0.14300100 |
| H | 6.19785600 | -3.37300000 | 0.66087000  |
| C | 3.24130700 | -3.20852500 | 2.56947600  |
| C | 4.07915600 | -2.10276000 | 2.76849300  |
| H | 3.77141600 | -1.25850700 | 2.52617300  |
| C | 5.33447600 | -2.21553600 | 3.30573600  |
| H | 5.85179500 | -1.45858000 | 3.45733800  |
| C | 5.82320900 | -3.48233800 | 3.62095000  |
| H | 6.68866500 | -3.58017900 | 3.94564800  |
| C | 5.00609500 | -4.60429600 | 3.44634700  |
| H | 5.30172900 | -5.44216700 | 3.72175500  |
| C | 3.75192300 | -4.46786300 | 2.86038900  |
| H | 3.25070600 | -5.22631700 | 2.66099100  |
| C | 0.57838500 | -3.06087800 | 3.56263700  |



|   |             |             |             |
|---|-------------|-------------|-------------|
| C | -0.76662000 | -2.65343500 | 3.54767400  |
| H | -1.12691100 | -2.31153600 | 2.76227500  |
| C | -1.56894800 | -2.75096600 | 4.67585300  |
| H | -2.46488900 | -2.50346000 | 4.64612200  |
| C | -0.99725100 | -3.23284200 | 5.86600100  |
| H | -1.51240600 | -3.29253600 | 6.63875600  |
| C | 0.32332300  | -3.61544800 | 5.88724900  |
| H | 0.69335400  | -3.93474400 | 6.67912400  |
| C | 1.10956100  | -3.53599600 | 4.76021000  |
| H | 2.00077700  | -3.79931600 | 4.79827200  |
| C | 1.12968200  | -4.57103100 | 1.17921200  |
| C | 0.03869100  | -5.33502200 | 1.55228400  |
| H | -0.52333300 | -5.05330400 | 2.23800000  |
| C | -0.20596400 | -6.54684600 | 0.87831500  |
| H | -0.94481300 | -7.06586600 | 1.10043600  |
| C | 0.66221600  | -6.96212900 | -0.11856900 |
| H | 0.49640600  | -7.75820700 | -0.57199800 |
| C | 1.71255700  | -6.24643900 | -0.43074400 |
| H | 2.30174900  | -6.55756400 | -1.08029900 |
| C | 1.96917000  | -5.00596200 | 0.20089800  |
| H | 2.70359400  | -4.49314600 | -0.04828600 |
| C | -1.84904537 | 0.26876229  | 4.22801592  |
| C | -1.73069562 | 0.10471692  | 5.59116616  |
| H | -0.93334842 | 0.32825066  | 6.01416846  |
| C | -2.77967777 | -0.38780791 | 6.33286070  |
| H | -2.69069279 | -0.49560638 | 7.25245048  |
| C | -3.99590557 | -0.72924495 | 5.69364610  |
| H | -4.70278101 | -1.09400278 | 6.17626373  |
| C | -4.10903670 | -0.50078458 | 4.29431388  |
| H | -4.92172076 | -0.65458674 | 3.86822410  |

|   |             |             |             |
|---|-------------|-------------|-------------|
| C | -3.02952486 | -0.05290378 | 3.55981534  |
| H | -3.08933770 | 0.03297939  | 2.63568511  |
| C | -0.40776862 | 2.72190025  | 3.72228760  |
| C | 0.11052120  | 3.08067290  | 4.98068421  |
| H | 0.45295635  | 2.43755710  | 5.55829280  |
| C | 0.09506584  | 4.44002712  | 5.33979145  |
| H | 0.44197184  | 4.69427430  | 6.16527678  |
| C | -0.41146040 | 5.39344174  | 4.51517289  |
| H | -0.43104397 | 6.28029921  | 4.79046719  |
| C | -0.90929290 | 5.04200083  | 3.23532089  |
| H | -1.22895760 | 5.69471350  | 2.65596038  |
| C | -0.91079657 | 3.68128683  | 2.85954182  |
| H | -1.24956754 | 3.42809138  | 2.03092216  |
| C | 1.07547016  | 0.29518758  | 3.91054637  |
| C | 1.18319583  | -0.80278333 | 4.75475167  |
| H | 0.41827153  | -1.28339915 | 4.97880201  |
| C | 2.38704565  | -1.18955318 | 5.26515926  |
| H | 2.42912733  | -1.89617266 | 5.86851594  |
| C | 3.58199659  | -0.52038507 | 4.87724687  |
| H | 4.41315194  | -0.80264294 | 5.18759517  |
| C | 3.47316937  | 0.53299563  | 4.05161665  |
| H | 4.24100572  | 1.00601937  | 3.82268594  |
| C | 2.24687204  | 0.94472787  | 3.52174653  |
| H | 2.21114284  | 1.64829106  | 2.91447006  |
| C | -6.52328226 | 1.79245639  | -1.75987271 |
| C | -7.86965871 | 1.38291944  | -1.66666942 |
| H | -8.24180777 | 1.19185605  | -0.83668277 |
| C | -8.63827835 | 1.26453843  | -2.82074922 |
| H | -9.50985943 | 0.94403185  | -2.77135573 |
| C | -8.08030982 | 1.64078491  | -4.08329837 |

|   |             |             |             |
|---|-------------|-------------|-------------|
| H | -8.58218844 | 1.58293661  | -4.86295961 |
| C | -6.78866900 | 2.08622237  | -4.10996614 |
| H | -6.41439850 | 2.34664552  | -4.92182327 |
| C | -6.02205889 | 2.16027869  | -2.95363370 |
| H | -5.14640336 | 2.46837053  | -3.00573995 |
| C | -5.76005650 | 3.63401466  | 0.36655245  |
| C | -7.00961135 | 4.22354399  | 0.36570808  |
| H | -7.75599240 | 3.72614644  | 0.11825880  |
| C | -7.15782623 | 5.54026302  | 0.72746364  |
| H | -8.00326029 | 5.92630553  | 0.69490617  |
| C | -6.09107439 | 6.30149472  | 1.13362783  |
| H | -6.20535902 | 7.17966136  | 1.41764791  |
| C | -4.80353034 | 5.69694102  | 1.10380900  |
| H | -4.05714926 | 6.19433853  | 1.35125928  |
| C | -4.64477218 | 4.37993641  | 0.71200182  |
| H | -3.79746599 | 3.99892152  | 0.68123618  |
| C | -6.29524946 | 0.82833545  | 0.92574367  |
| C | -6.41693770 | -0.50932508 | 0.59384592  |
| H | -6.03885788 | -0.81358602 | -0.19928290 |
| C | -7.07615010 | -1.39079808 | 1.39454621  |
| H | -7.15042509 | -2.28146118 | 1.13746025  |
| C | -7.63777392 | -0.97243747 | 2.59136024  |
| H | -8.10266879 | -1.57052203 | 3.13044165  |
| C | -7.49379698 | 0.34654777  | 2.97154788  |
| H | -7.84677659 | 0.63678636  | 3.78033588  |
| C | -6.81970294 | 1.24597764  | 2.14500411  |
| H | -6.72114699 | 2.13159395  | 2.40956464  |
| C | -4.85101503 | -2.97587889 | -2.09832469 |
| C | -4.99065058 | -1.82112704 | -2.87303109 |
| H | -4.26986029 | -1.23623047 | -2.93624845 |

|   |             |             |             |
|---|-------------|-------------|-------------|
| C | -6.14108796 | -1.51652926 | -3.54294821 |
| H | -6.16994494 | -0.78951912 | -4.12198592 |
| C | -7.28563632 | -2.31365479 | -3.34328755 |
| H | -8.10078451 | -2.07226883 | -3.72158322 |
| C | -7.18162681 | -3.43365315 | -2.59881958 |
| H | -7.92411339 | -3.99002889 | -2.52086632 |
| C | -6.01132654 | -3.78915043 | -1.94260075 |
| H | -5.98357829 | -4.54964225 | -1.40840357 |
| C | -3.88353218 | -4.27691526 | 0.21138470  |
| C | -4.29988007 | -3.53596133 | 1.30130340  |
| H | -4.17316239 | -2.61503524 | 1.31735007  |
| C | -4.89858166 | -4.16736960 | 2.35665895  |
| H | -5.17786917 | -3.67087800 | 3.09156106  |
| C | -5.09353404 | -5.55777318 | 2.34231566  |
| H | -5.52829121 | -5.98264893 | 3.04676245  |
| C | -4.63765151 | -6.27192491 | 1.28618417  |
| H | -4.74080654 | -7.19664551 | 1.27968790  |
| C | -4.00244500 | -5.62950088 | 0.18128644  |
| H | -3.67995066 | -6.12252234 | -0.53873152 |
| C | -2.35735251 | -4.40061883 | -2.33836201 |
| C | -2.90998213 | -5.49183902 | -3.02751393 |
| H | -3.81150505 | -5.69223145 | -2.91641829 |
| C | -2.14199680 | -6.26915807 | -3.86546298 |
| H | -2.51380386 | -7.01899713 | -4.27248527 |
| C | -0.79815338 | -5.93165303 | -4.10674235 |
| H | -0.28780210 | -6.42821181 | -4.70288450 |
| C | -0.24148415 | -4.84575149 | -3.44120955 |
| H | 0.64925924  | -4.61800802 | -3.58117167 |
| C | -1.02909950 | -4.09871168 | -2.56054759 |
| H | -0.64707498 | -3.38085382 | -2.11202173 |

|    |             |             |             |
|----|-------------|-------------|-------------|
| N  | 1.42793800  | 0.20598200  | -0.85820300 |
| N  | -1.51265300 | 0.51135400  | -0.92739000 |
| P  | 2.36148700  | 4.38255700  | -0.33976900 |
| P  | 5.56564400  | -1.07755500 | -1.11932900 |
| P  | 1.53255000  | -2.99859000 | 2.01526000  |
| P  | -0.47463708 | 0.96391363  | 3.24091900  |
| P  | -5.50271074 | 1.93594838  | -0.25660868 |
| P  | -3.31986091 | -3.34865228 | -1.23573133 |
| Au | 1.81736600  | 2.20134800  | -0.45721800 |
| Au | 3.45824600  | -0.32797500 | -0.99263600 |
| Au | 1.27206800  | -1.23072500 | 0.65429600  |
| Au | -0.80498698 | 0.71507022  | 1.03210611  |
| Au | -3.38152444 | 1.32691671  | -0.64031930 |
| Au | -2.27007337 | -1.39788656 | -0.88364846 |

**Condition E:** N1-C1-C2-N2 dihedral angle is 64.92°. C1-C2-N2-Au4 dihedral angle is 59.42°.

|   |             |             |             |
|---|-------------|-------------|-------------|
| C | 0.62688800  | 0.01671800  | -2.02227900 |
| H | 0.32273700  | -0.91251000 | -1.97910500 |
| C | -0.65973700 | 0.91085700  | -1.97787800 |
| H | -0.38462200 | 1.84274700  | -1.85309000 |
| C | 1.37841800  | 0.16186500  | -3.28797000 |
| C | 1.82779800  | 1.39885300  | -3.81494300 |
| H | 1.64547600  | 2.18015300  | -3.34480300 |
| C | 2.54669800  | 1.48514400  | -5.03489100 |
| H | 2.88379100  | 2.29569600  | -5.34011300 |
| C | 2.72445700  | 0.32896600  | -5.74870100 |
| H | 3.16345500  | 0.37169700  | -6.56902100 |

|   |             |             |             |
|---|-------------|-------------|-------------|
| C | 2.28051000  | -0.89109700 | -5.30006200 |
| H | 2.42130200  | -1.65255400 | -5.81503300 |
| C | 1.62373600  | -0.99473700 | -4.08496000 |
| H | 1.33899900  | -1.82772500 | -3.78508500 |
| C | -1.47238300 | 0.81414500  | -3.29365400 |
| C | -2.12767100 | 1.93729200  | -3.72446600 |
| H | -2.02859100 | 2.73773400  | -3.26250200 |
| C | -2.94286900 | 1.88716900  | -4.85601900 |
| H | -3.40354500 | 2.64593200  | -5.12955400 |
| C | -3.06721300 | 0.71933900  | -5.56502200 |
| H | -3.60147800 | 0.69667700  | -6.32660000 |
| C | -2.39119600 | -0.44381600 | -5.14702200 |
| H | -2.47478400 | -1.23775500 | -5.62374400 |
| C | -1.60218500 | -0.37906200 | -4.01436700 |
| H | -1.15135900 | -1.14030400 | -3.72677000 |
| C | 1.10115200  | 5.57233300  | -0.24934500 |
| C | -0.20127300 | 5.14392600  | -0.64608600 |
| H | -0.34003600 | 4.24725800  | -0.84514700 |
| C | -1.25844300 | 6.02392400  | -0.74083200 |
| H | -2.06881700 | 5.74399100  | -1.10057300 |
| C | -1.10434600 | 7.33270200  | -0.29545100 |
| H | -1.83524900 | 7.90580500  | -0.25073400 |
| C | 0.22606000  | 7.79487400  | 0.10210200  |
| H | 0.37180700  | 8.68505300  | 0.32736500  |
| C | 1.27014500  | 6.87058300  | 0.13687600  |
| H | 2.10717800  | 7.14828500  | 0.43252100  |
| C | 3.37562200  | 4.87459800  | -1.79167400 |
| C | 4.16205400  | 3.89087900  | -2.43843100 |
| H | 4.22576800  | 3.03665900  | -2.07732500 |
| C | 4.82999200  | 4.19943700  | -3.59336200 |

|   |            |             |             |
|---|------------|-------------|-------------|
| H | 5.33234500 | 3.53173700  | -4.00233000 |
| C | 4.79945000 | 5.41129200  | -4.16884300 |
| H | 5.26426600 | 5.59865900  | -4.95168200 |
| C | 4.00834500 | 6.39202800  | -3.50247500 |
| H | 3.97561200 | 7.25344200  | -3.85311700 |
| C | 3.30076400 | 6.12188300  | -2.37691000 |
| H | 2.76187200 | 6.77931200  | -1.99953500 |
| C | 3.51922000 | 4.80976900  | 1.10507400  |
| C | 2.97024000 | 5.12518000  | 2.35827500  |
| H | 2.04960400 | 5.23091500  | 2.43702500  |
| C | 3.77952300 | 5.28506800  | 3.49885800  |
| H | 3.41717100 | 5.45426100  | 4.33829200  |
| C | 5.20645400 | 5.17306800  | 3.29368400  |
| H | 5.78669400 | 5.35229300  | 3.99990800  |
| C | 5.70341900 | 4.81814000  | 2.11464500  |
| H | 6.61892200 | 4.66390200  | 2.05626900  |
| C | 4.93731100 | 4.66290700  | 0.95331100  |
| H | 5.32674900 | 4.47626100  | 0.13021800  |
| C | 6.71581600 | -0.63157900 | 0.14534700  |
| C | 6.32507200 | 0.40490700  | 1.00391500  |
| H | 5.50959700 | 0.83103600  | 0.86797100  |
| C | 7.13835600 | 0.80338400  | 2.05432100  |
| H | 6.88410100 | 1.49554100  | 2.61867400  |
| C | 8.35994900 | 0.13066400  | 2.23846900  |
| H | 8.93255500 | 0.41379200  | 2.91452200  |
| C | 8.72615900 | -0.91743600 | 1.46300100  |
| H | 9.52590600 | -1.36300300 | 1.63053700  |
| C | 7.89502600 | -1.33517400 | 0.39776300  |
| H | 8.13004500 | -2.06672200 | -0.12785700 |
| C | 6.36061900 | -0.54262900 | -2.73155600 |

|   |            |             |             |
|---|------------|-------------|-------------|
| C | 5.64431500 | 0.15208800  | -3.63875300 |
| H | 4.77917100 | 0.42275500  | -3.42882700 |
| C | 6.19130800 | 0.47853000  | -4.90910100 |
| H | 5.65415800 | 0.86398500  | -5.56392000 |
| C | 7.51358400 | 0.22140500  | -5.16257500 |
| H | 7.92488200 | 0.50622200  | -5.94742400 |
| C | 8.19777400 | -0.47585500 | -4.20589500 |
| H | 9.08558200 | -0.69763000 | -4.37527000 |
| C | 7.66459000 | -0.86082100 | -3.03767900 |
| H | 8.17767000 | -1.34465700 | -2.43145000 |
| C | 5.51450200 | -2.89328000 | -1.26420600 |
| C | 4.87692200 | -3.41597000 | -2.39377100 |
| H | 4.58396300 | -2.84746100 | -3.06931000 |
| C | 4.68272700 | -4.79327100 | -2.50724700 |
| H | 4.28215400 | -5.14057200 | -3.26990700 |
| C | 5.08697000 | -5.65861100 | -1.47926400 |
| H | 4.92625000 | -6.57284600 | -1.53876000 |
| C | 5.70595400 | -5.14145300 | -0.41003400 |
| H | 6.04254000 | -5.72086800 | 0.23426100  |
| C | 5.87125300 | -3.73946000 | -0.22154100 |
| H | 6.20727400 | -3.40109800 | 0.57732500  |
| C | 3.29473200 | -3.20880000 | 2.54992000  |
| C | 4.15133000 | -2.11540000 | 2.73708200  |
| H | 3.84976400 | -1.26573900 | 2.50616800  |
| C | 5.41625000 | -2.24792400 | 3.24658300  |
| H | 5.94675100 | -1.49877900 | 3.39127400  |
| C | 5.89467500 | -3.52291100 | 3.54411400  |
| H | 6.76550300 | -3.63409600 | 3.84958400  |
| C | 5.05911100 | -4.63292000 | 3.38082300  |
| H | 5.34936900 | -5.47623500 | 3.64511200  |



|   |             |             |             |
|---|-------------|-------------|-------------|
| C | 3.79461100  | -4.47647100 | 2.82272700  |
| H | 3.27916400  | -5.22704500 | 2.62989700  |
| C | 0.65589500  | -3.03181800 | 3.60089100  |
| C | -0.68356500 | -2.60654800 | 3.61712000  |
| H | -1.05599900 | -2.25529500 | 2.84157500  |
| C | -1.46278100 | -2.70010900 | 4.76171600  |
| H | -2.35577100 | -2.44061000 | 4.75263500  |
| C | -0.87221000 | -3.19650500 | 5.93658300  |
| H | -1.37145000 | -3.25393500 | 6.71988400  |
| C | 0.44329400  | -3.59665300 | 5.92730100  |
| H | 0.82590400  | -3.92547300 | 6.70923800  |
| C | 1.20620700  | -3.52096300 | 4.78409000  |
| H | 2.09444000  | -3.79626200 | 4.80151300  |
| C | 1.13582800  | -4.53505800 | 1.19773800  |
| C | 0.04297900  | -5.28674400 | 1.58988100  |
| H | -0.50042300 | -5.00166600 | 2.28908600  |
| C | -0.23220000 | -6.49123600 | 0.91454200  |
| H | -0.97298300 | -7.00174400 | 1.14957600  |
| C | 0.60881600  | -6.91207900 | -0.10308200 |
| H | 0.42272700  | -7.70321000 | -0.55729900 |
| C | 1.66168700  | -6.20850900 | -0.43374100 |
| H | 2.23263100  | -6.52356500 | -1.09754100 |
| C | 1.94829600  | -4.97527700 | 0.19918700  |
| H | 2.68399300  | -4.47075500 | -0.06284400 |
| C | -1.94711595 | -0.00838604 | 4.25305178  |
| C | -1.85269407 | -0.25490317 | 5.60560978  |
| H | -1.05910706 | -0.06880715 | 6.05309921  |
| C | -2.92008247 | -0.77496113 | 6.30079003  |
| H | -2.84720216 | -0.93853821 | 7.21354085  |
| C | -4.13067810 | -1.05964994 | 5.62418331  |

|   |             |             |             |
|---|-------------|-------------|-------------|
| H | -4.85014301 | -1.44187894 | 6.07352907  |
| C | -4.21840765 | -0.74676567 | 4.23943394  |
| H | -5.02630506 | -0.86284978 | 3.79279128  |
| C | -3.12123503 | -0.27215086 | 3.54922967  |
| H | -3.16518392 | -0.13061353 | 2.63107593  |
| C | -0.46386112 | 2.44873326  | 3.91623572  |
| C | 0.03937800  | 2.72432043  | 5.20142331  |
| H | 0.36359335  | 2.04298206  | 5.74470505  |
| C | 0.03723218  | 4.06000678  | 5.64071361  |
| H | 0.37452717  | 4.25954750  | 6.48500403  |
| C | -0.44278586 | 5.06818581  | 4.86694080  |
| H | -0.45433505 | 5.93730635  | 5.19432685  |
| C | -0.92512980 | 4.80088629  | 3.56108383  |
| H | -1.22641653 | 5.49156788  | 3.01696585  |
| C | -0.93969223 | 3.46508645  | 3.10481799  |
| H | -1.26879134 | 3.26666057  | 2.25758202  |
| C | 0.98214716  | -0.00670223 | 3.98160425  |
| C | 1.06112272  | -1.15438734 | 4.76032481  |
| H | 0.28610135  | -1.63602416 | 4.94381047  |
| C | 2.25120810  | -1.58869810 | 5.26473903  |
| H | 2.27384017  | -2.33047652 | 5.82543041  |
| C | 3.46139333  | -0.91553045 | 4.93539724  |
| H | 4.28349731  | -1.22808206 | 5.24077956  |
| C | 3.38039929  | 0.18656266  | 4.17254012  |
| H | 4.15830412  | 0.66086801  | 3.98377371  |
| C | 2.16852939  | 0.64727890  | 3.64985208  |
| H | 2.15226675  | 1.38614586  | 3.08516235  |
| C | -6.50409233 | 1.93795207  | -1.70267324 |
| C | -7.85736938 | 1.54369825  | -1.65426407 |
| H | -8.24526190 | 1.30920705  | -0.84282633 |

|   |             |             |             |
|---|-------------|-------------|-------------|
| C | -8.60917658 | 1.50558019  | -2.82474357 |
| H | -9.48582642 | 1.19572071  | -2.80763097 |
| C | -8.02605964 | 1.94784706  | -4.05409123 |
| H | -8.51627709 | 1.94392170  | -4.84325170 |
| C | -6.72806103 | 2.37479427  | -4.03477083 |
| H | -6.33736458 | 2.67740512  | -4.82394225 |
| C | -5.97891818 | 2.36856677  | -2.86471694 |
| H | -5.09832612 | 2.66613445  | -2.88521661 |
| C | -5.74901025 | 3.63829801  | 0.54102864  |
| C | -6.99003385 | 4.24538252  | 0.55662310  |
| H | -7.73927622 | 3.77474454  | 0.26877896  |
| C | -7.12554812 | 5.54033466  | 0.99402268  |
| H | -7.96488330 | 5.94017917  | 0.97188181  |
| C | -6.05483531 | 6.26010641  | 1.46082305  |
| H | -6.16132427 | 7.12144533  | 1.79498171  |
| C | -4.77555535 | 5.63928501  | 1.41429807  |
| H | -4.02631198 | 6.10992292  | 1.70214219  |
| C | -4.62902703 | 4.34567664  | 0.94704315  |
| H | -3.78674695 | 3.95458588  | 0.90630897  |
| C | -6.33215780 | 0.81262777  | 0.92375879  |
| C | -6.46725238 | -0.50097987 | 0.51086410  |
| H | -6.08093511 | -0.76316314 | -0.29324563 |
| C | -7.15132921 | -1.41856785 | 1.24757921  |
| H | -7.23395977 | -2.29117243 | 0.93673105  |
| C | -7.72595376 | -1.06376027 | 2.45866508  |
| H | -8.20764822 | -1.68583690 | 2.95407629  |
| C | -7.56960217 | 0.22800648  | 2.91897785  |
| H | -7.93126800 | 0.47488692  | 3.73825770  |
| C | -6.86998614 | 1.16483113  | 2.15776252  |
| H | -6.76326881 | 2.03159172  | 2.47613262  |

|   |             |             |             |
|---|-------------|-------------|-------------|
| C | -4.89347288 | -2.82621598 | -2.29987887 |
| C | -5.00465795 | -1.62551016 | -3.00632367 |
| H | -4.27485331 | -1.04869149 | -3.02372298 |
| C | -6.13996184 | -1.26453324 | -3.67404675 |
| H | -6.14947379 | -0.50404541 | -4.20905020 |
| C | -7.29855993 | -2.05498059 | -3.53947818 |
| H | -8.10415556 | -1.77942273 | -3.91487850 |
| C | -7.22202769 | -3.21867119 | -2.86167708 |
| H | -7.97335863 | -3.76757501 | -2.82819427 |
| C | -6.06735993 | -3.62993314 | -2.21036360 |
| H | -6.05871447 | -4.42115904 | -1.72213067 |
| C | -3.98100238 | -4.27649435 | -0.05765578 |
| C | -4.40418039 | -3.59550984 | 1.06816133  |
| H | -4.26487465 | -2.67915486 | 1.14101594  |
| C | -5.02830192 | -4.27953845 | 2.07487349  |
| H | -5.31223863 | -3.82349787 | 2.83381661  |
| C | -5.24241418 | -5.66357421 | 1.97468675  |
| H | -5.69418008 | -6.12304318 | 2.64593554  |
| C | -4.77987189 | -6.32040397 | 0.88478573  |
| H | -4.89582505 | -7.24146418 | 0.82158976  |
| C | -4.11831398 | -5.62297877 | -0.17017115 |
| H | -3.79136848 | -6.07708385 | -0.91340308 |
| C | -2.41647358 | -4.27115425 | -2.58707299 |
| C | -2.97330506 | -5.31113410 | -3.34830439 |
| H | -3.87918733 | -5.50432545 | -3.26289008 |
| C | -2.20307181 | -6.04862941 | -4.21952627 |
| H | -2.57882138 | -6.76732972 | -4.67608503 |
| C | -0.85098565 | -5.71743436 | -4.42006721 |
| H | -0.33823878 | -6.18522933 | -5.03705224 |
| C | -0.28981607 | -4.68141962 | -3.68266826 |

|    |             |             |             |
|----|-------------|-------------|-------------|
| H  | 0.60613073  | -4.45905292 | -3.79542359 |
| C  | -1.08077537 | -3.97639292 | -2.77091361 |
| H  | -0.69591458 | -3.29223199 | -2.27468548 |
| N  | 1.45409900  | 0.24951600  | -0.81879900 |
| N  | -1.52568400 | 0.53514700  | -0.87307600 |
| P  | 2.45418100  | 4.41025800  | -0.29713900 |
| P  | 5.56777000  | -1.08704700 | -1.17597900 |
| P  | 1.57745200  | -2.97303300 | 2.03373900  |
| P  | -0.54765130 | 0.72365617  | 3.32990041  |
| P  | -5.50557456 | 1.97662789  | -0.17839635 |
| P  | -3.38154453 | -3.27236289 | -1.43820318 |
| Au | 1.87861400  | 2.23716200  | -0.41509500 |
| Au | 3.47375700  | -0.31043300 | -0.99982600 |
| Au | 1.31149700  | -1.19389100 | 0.68862100  |
| Au | -0.84639065 | 0.61147870  | 1.10547234  |
| Au | -3.38729036 | 1.35995119  | -0.56591329 |
| Au | -2.31031042 | -1.36182411 | -0.95467166 |
